# Supplementary material for: Understanding men’s psychological reactions and experience following a cardiac event: a qualitative study from the MindTheHeart project
Source: PubMed Central journal article supplement — BMJ Open. 2019 Sep 27;9(9):e029560. doi: 10.1136/bmjopen-2019-029560 (PMC6773299; doi:10.1136/bmjopen-2019-029560), 2019-09-27
Supplement: bmjopen-2019-029560.draft_revisions.pdf [file bmjopen-2019-029560.draft_revisions.pdf]

# BMJ Open

BMJ Open is committed to open peer review. As part of this commitment we make the peer review history of every article we publish publicly available.

When an article is published we post the peer reviewers' comments and the authors' responses online. We also post the versions of the paper that were used during peer review. These are the versions that the peer review comments apply to.

The versions of the paper that follow are the versions that were submitted during the peer review process. They are not the versions of record or the final published versions. They should not be cited or distributed as the published version of this manuscript.

BMJ Open is an open access journal and the full, final, typeset and author-corrected version of record of the manuscript is available on our site with no access controls, subscription charges or pay-per-view fees (<http://bmjopen.bmj.com>).

If you have any questions on BMJ Open's open peer review process please email [info.bmjopen@bmj.com](mailto:info.bmjopen@bmj.com)

# BMJ Open

## Understanding men's psychological reactions and experience following a cardiac event: A qualitative study from the MindTheHeart Project

|                               |                                                                                                                                                                                                                                                                                                                                                                                                                                                                                                                                                                                                                                                                                                                                           |
|-------------------------------|-------------------------------------------------------------------------------------------------------------------------------------------------------------------------------------------------------------------------------------------------------------------------------------------------------------------------------------------------------------------------------------------------------------------------------------------------------------------------------------------------------------------------------------------------------------------------------------------------------------------------------------------------------------------------------------------------------------------------------------------|
| Journal:                      | <i>BMJ Open</i>                                                                                                                                                                                                                                                                                                                                                                                                                                                                                                                                                                                                                                                                                                                           |
| Manuscript ID                 | bmjopen-2019-029560                                                                                                                                                                                                                                                                                                                                                                                                                                                                                                                                                                                                                                                                                                                       |
| Article Type:                 | Research                                                                                                                                                                                                                                                                                                                                                                                                                                                                                                                                                                                                                                                                                                                                  |
| Date Submitted by the Author: | 05-Feb-2019                                                                                                                                                                                                                                                                                                                                                                                                                                                                                                                                                                                                                                                                                                                               |
| Complete List of Authors:     | Jbilou, Jalila; Universite de Moncton, Psychology; Universite de Moncton, Centre de formation médicale du Nouveau Brunswick<br>Grenier, Jean; Hopital Montfort, Institut du Savoir Montfort<br>Chomienne, Marie-Helene; University of Ottawa, Family Medicine;<br>University of Ottawa, School of Epidemiology and Public Health<br>Talbot, France; Universite de Moncton, Psychology<br>Tulloch, Heather; University of Ottawa Heart Institute, Prevention and Rehabilitation<br>D'Antono, Bianca; Universite de Montreal, Psychology ; Montreal Heart Institute , Research centre<br>Greenman, Paul; Universite du Quebec en Outaouais, Département de Psychoéducation et de Psychologie; Hopital Montfort, Institut du Savoir Montfort |
| Keywords:                     | Depression & mood disorders < PSYCHIATRY, QUALITATIVE RESEARCH, REHABILITATION MEDICINE, Coronary heart disease < CARDIOLOGY, Ischaemic heart disease < CARDIOLOGY, Myocardial infarction < CARDIOLOGY                                                                                                                                                                                                                                                                                                                                                                                                                                                                                                                                    |
|                               |                                                                                                                                                                                                                                                                                                                                                                                                                                                                                                                                                                                                                                                                                                                                           |

SCHOLARONE™  
Manuscripts

## Understanding men's psychological reactions and experience following a cardiac event: A qualitative study from the MindTheHeart Project

---

**Authors:** Jalila Jbilou PhD, MD; Jean Grenier PhD, CPsych; Marie-Hélène Chomienne MSc, MD; France Talbot PhD, LPsych; Heather Tulloch PhD, CPsych; Bianca D'Antono PhD; Paul S. Greenman PhD, CPsych on behalf of the MindTheHeart Project Team

- **Corresponding author:** Jalila Jbilou, 18 Ave Antonine Maillet, Moncton E1A3E9 New Brunswick, Canada. [jalila.jbilou@umoncton.ca](mailto:jalila.jbilou@umoncton.ca) Tel: 1-506-858-4931
- **Co-authors:**
  - Jean Grenier, Institut du Savoir Montfort, Hôpital Montfort, Ottawa, Canada
  - Marie-Hélène Chomienne, Department of Family Medicine, and School of Epidemiology and Public Health, University of Ottawa, Ottawa, Canada
  - France Talbot, School of psychology, Université de Moncton, Moncton, Canada
  - Heather Tulloch, University of Ottawa Heart Institute, Prevention and Rehabilitation, Ottawa, Canada
  - Bianca D'Antono, Psychology Department, Université de Montréal, and Research Centre, Montreal Heart Institute, Montreal, Canada
  - Paul S. Greenman, Département de psychoéducation et de psychologie, Université du Québec en Outaouais, Gatineau, Canada and Institut du Savoir Montfort, Hôpital Montfort, Ottawa, Canada.
- Word count (6356 words), excluding title page, abstract, references, figures and tables.

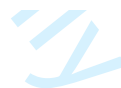

## Abstract:

**Objectives:** Depression, anxiety, and post-traumatic stress disorder (PTSD) are common following a cardiac event. Despite their high prevalence, these psychological disorders often go undiagnosed. Research suggests that men are particularly at higher risk and a better understanding of their experience with the cardiac event and the health services is key for adapting approaches to their needs. The aim of this study was to describe the self-reported emotional challenges that men face following a cardiac event and to understand their patterns of psychosocial adjustment. **Design** Qualitative study (focus groups and semi-structured interviews) using interpretive phenomenological analysis.

**Setting** Three Canadian provinces. **Participants** A total of 93 men participated in the study through focus groups (22) and semi-structured interviews (5). **Results** Four major themes emerged: 1) Managing uncertainty and adversity; 2) Distancing, normalizing, and accepting; 3) Conformity to traditional masculine norms; and 4) Social, literacy and communication challenges.

**Conclusions** Health professionals caring for men following a cardiac event must be aware of the psychological and social adjustments that accompany the physical challenges. However, there are a lack of explicit guidelines, tools and clinical training in men-sensitive approaches. Further research is required to better inform clinical practices and healthcare services.

### Strengths and limitations of this study

Identified a new concept, the “broken masculinity” shedding light on an unrecognized aspect of the psychological reactions and help-seeking behaviour in men following a cardiac event.

Explored men’s experience following a cardiac event to inform the development of a men-sensitive stepped-care model.

Men from cultural minority and Indigenous population were not included in this study. Thus, our results do not capture their needs and expectations. Further research is needed.

## 1. Introduction

Depression, anxiety, and post-traumatic stress disorder (PTSD) are common among patients who experienced a major cardiovascular event (i.e. acute coronary syndrome (ACS)) [1]. Despite their high prevalence, these psychological disorders often go undiagnosed and contribute to an increased risk of related morbidity and mortality, as well as social and economic vulnerability [2]. Psychocardiology, or clinical psychology in the cardiac setting, is the science and practice of applying psychological knowledge to the prevention, treatment, and rehabilitation of patients with cardiac disease [3]. From this perspective, psychological and cardiac issues are interdependently addressed by collaborative interprofessional teams through patient-centred approaches.

Stepped-care models include a continuum of mental health interventions and services required to provide adequate health services and support in the most cost-efficient manner, based on patients' needs and choices. These models have shown effectiveness with different health conditions, including cardiac illnesses [4–7]. However, the last two decades of research in psychocardiology show that fewer than 25% of men with ACS engage in secondary prevention delivered by cardiac rehabilitation centers, seek support, or use appropriate timely interventions for their psychological distress and mental health [8–10]. Implementing effective psychocardiology stepped-care services for this population would require taking into account the social and behavioural determinants of men's health. To our knowledge, no research has been conducted on the acceptability and feasibility of a stepped-care model approach to psychological treatment that has been specifically designed to be sensitive to the needs and expectations of men with cardiac disease.

The MindTheHeart program, an innovative psychocardiology initiative launched in three Canadian provinces, aims to improve the prevention, early detection, and treatment of depression, anxiety and PTSD (D/A/PTSD) in men following a cardiac event. The cornerstone of this program was to design and test the feasibility and acceptability of a stepped-care approach to treatment structured into: Step 1: Psychoeducational intervention, Step 2: Group therapy including sessions with a significant other, and Step 3: Individual or couple therapy based on patient preference.

To appropriately design and tailor this stepped-care model to the needs of men following a cardiac event, it was essential to gain a better understanding of their experiences with heart disease and existing health services (or lack thereof). For the purposes of this article, our aims are to describe the self-reported emotional challenges that men face following a cardiac event and to understand their patterns of psychosocial adjustment.

## 2. Methods

### 2.1. Study design

A qualitative study was conducted using an inductive phenomenological qualitative approach to provide a detailed description of the experience of men with cardiac disease while staying true to the collected qualitative data [11,12]. The consolidated criteria for reporting qualitative research (COREQ) were used to structure this study and ensure its methodological quality [13].

### 2.2. Participants

Convenience samples were recruited through cardiac rehabilitation programs and cardiac departments or clinics at teaching hospitals as well as in the community in New Brunswick, Ontario and Quebec. To recruit participants we used a combination of active strategies (patients' solicitation at participating cardiac rehabilitation programs and a snowball technique) and passive strategies (radio broadcasts and local newspapers advertisement). The inclusion criteria were: 1) to be 19 and over in New-Brunswick, and 18 and over in Ontario and Quebec; 2) to have had a myocardial infarction, unstable angina, or heart surgery in the last 5 years with or without depression, anxiety or PTSD; 3) to be able to read and speak English or French; and 4) to be willing to participate in a group discussion. A sampling frame was developed to capture variation in age, marital status, cardiac health, mental health conditions, sexual orientation, spoken language (French or English), and socioeconomic status.

### 2.3. Data collection

Data collection took place between May 2016 and August 2017. The focus group qualitative technique was selected to gather information [12]. This technique is appropriate for exploring patients' experiences and perspectives through a collective discussion. Interactions and discussions between participants are encouraged. Experiences and opinions are shared and explored while participants are questioning or challenging one another or disagreeing with one another. Initially, only focus groups were planned, but due to challenges in recruiting a sufficient number of participants (time constraints, limited availability due to summer vacations, reticence to partake in a group discussion), we also carried out a total of five (n=5) one-on-one semi-structured interviews to ensure inclusiveness. Focus group discussions were facilitated by two members of the research team using a discussion guide (See Appendix 1). A preliminary version of the guide was reviewed by four male patients (two French and two English) to assess its intelligibility and appropriateness. All authors conducted the focus group or the semi-structured interview. The same interview guide was used for the semi-structured interviews, which were conducted either face-to-face or by telephone. Participants were aware of the study's aims and objectives. They had the opportunity to ask their questions to the interviewers prior to giving their written informed consent to participate. Focus groups and semi-structured interviews were conducted in English or French based on participants' preference and took place at the hospital or the university. Data collection continued until information and conceptual saturation.

## 2.4. Data analysis

The audio-taped focus groups and semi-structured interviews from the three provinces were transcribed verbatim and anonymized. When available, the field notes taken by interviewees were included in the analysis. An interpretative phenomenological analysis (IPA) was used to guide the thematic analysis of the data [14,15]. IPA is an inductive qualitative content analysis that allows for the description of patterns without *a priori* theories or models to guide the analysis. The aim of IPA is to explore in depth the participants' personal experiences, their meaning for them, how they make sense of these experiences, and what they would recommend to better meet their needs. The analytic approach followed iterations of thematic content analysis and codes were created through open and axial coding to capture emergent themes [16].

To effectively manage the amount of collected data, we organized a collaborative analytic team. The first author was responsible for the data analysis management process including the development of the MindTheHeart manual for the qualitative study, the delivery of data analysis training sessions and the development of a codebook. She acted as a referee when needed. To ensure consistency in data analysis, 10% of the transcribed verbatims were randomly selected and four analysts independently coded 10% of the material. This strategy allowed the calculation of the inter-coder reliability [17]. The inter-coder reliability check consisted of coding and comparing the findings of each of the coders (2X2). The Cohen coefficient was used to assess to what extent the data deviated from perfect reliability. A coefficient of 80% or more was considered appropriate. Once this was reached, we considered that all analysts were using the same interpretative approach and data were analysed in a complementary manner. We performed three rounds of inter-coder reliability tests and two rounds of data analysis training sessions to create a convergent analytic approach. The transcribed material was analyzed through a systematized analytic process under the shared server of Nvivo11-Pro (QSR International, Doncaster, Victoria, Australia).

**Patient and Public Involvement:** Patients were not involved in the design of this study. Results were presented through public talks.

## 3. Results

We carried out a total of 22 focus groups ( 88 men) and 5 semi structured interviews with 5 men. In total, 93 men participated across the three provinces. Each focus group consisted of three to six participants and lasted approximately two hours (+/- 35 minutes). The semi-structured interview lasted between 60 and 90 minutes. The sociodemographic characteristics of the participants are presented in Table 1.

**Table 1 Sociodemographic characteristics of participants**

|                                                 | Mean age (years) (SD)                                     | Ethnicity                                                             | Education                                                  | Marital status                                                                                | Employment status                                                                        | Language     |
|-------------------------------------------------|-----------------------------------------------------------|-----------------------------------------------------------------------|------------------------------------------------------------|-----------------------------------------------------------------------------------------------|------------------------------------------------------------------------------------------|--------------|
| <b>New Brunswick</b>                            |                                                           |                                                                       |                                                            |                                                                                               |                                                                                          |              |
| Focus groups – (8 groups for a total of 37 men) | 64.2 (+/- 9.7)                                            | Caucasian: 37                                                         | Secondary: 17<br>College: 4<br>University: 16              | Single: 3<br>Married: 25<br>Divorced: 2<br>Common law: 4<br>Widowed: 2<br>Widow + Divorced: 1 | Employed: 13<br>Retired: 18<br>Sick leave: 3<br>Employed + retired: 1<br>Semi-Retired: 2 | 6 EN<br>2 FR |
| Semi-structured interviews (4 men)              | 51.5 (+/- 4.8)                                            | Caucasian: 4                                                          | College: 3<br>Secondary: 1                                 | Single: 2<br>Married: 2                                                                       | Employed: 3<br>Sick leave: 1                                                             | 3 EN<br>1 FR |
| <b>Ontario</b>                                  |                                                           |                                                                       |                                                            |                                                                                               |                                                                                          |              |
| Focus groups - (9 group for a total of 36 men)  | 65.8 (+/- 15.5)                                           | Caucasian: 34<br>Caucasian + Jewish: 1<br>Caucasian + First nation: 1 | Primary: 3<br>Secondary: 2<br>College: 7<br>University: 24 | Married: 19<br>Separated: 2<br>Divorced: 7<br>Common law: 7<br>Single: 1                      | Retired: 28<br>Sick leave: 3<br>Retired: 27<br>Employed + retired: 12                    | 4 EN<br>5 FR |
| <b>Quebec</b>                                   |                                                           |                                                                       |                                                            |                                                                                               |                                                                                          |              |
| Focus groups - (5 groups for a total of 15 men) | 67.5 (+/- 8.9)                                            | Caucasian: 15                                                         | Primary: 2<br>Secondary: 4<br>College: 4<br>University: 5  | Married: 9<br>Common law: 4<br>Single: 2                                                      | Employed: 1<br>Retired: 12<br>Sick leave: 1<br>Unemployed: 1                             | 4 FR<br>1 EN |
| Semi-structured interview (1 man)               | Not included to protect for anonymity and confidentiality |                                                                       |                                                            |                                                                                               |                                                                                          |              |

EN: English; FR: French

Interpretive phenomenological analysis of the gathered qualitative data from the three provinces highlighted the emotional issues faced by men and the patterns of psychosocial



1  
2  
3 adjustment challenges in men following a cardiac event. Emerging themes were  
4 categorized and presented below. Quotes have been reproduced to illustrate key points.  
5 To preserve anonymity and confidentiality quotes were tagged using a pseudo (male  
6 name). French quotes were translated into English for the purpose of this publication.  
7  
8

### 9 **3.1. Managing uncertainty and adversity**

10 A temporal sequence emerged across data as being instrumental in affecting men's  
11 experience following a cardiac event.  
12

#### 13 **"Not me, not now!" Denial reaction and delay in seeking help**

14  
15  
16 Refusing to recognize the cardiac event and purposely delaying the hospital (emergency  
17 department) visit seems to be a prevailing behaviour among men. *"I was working, my  
18 back got very sore, and I broke out in a cold sweat, but I finished my shift. I knew it was a  
19 heart... it was my heart. So, I went home, showered, ate a little bit and had my last  
20 cigarette, cause I'm a smoker."* - **Gérard**. *"I rolled over in the bed a couple of times when  
21 I should've gone to the hospital. Cause I know my wife would freak out, she'd be worried  
22 about me, right? And I know I'd be in the hospital for 12 hours, which would mean I  
23 couldn't go to work the next day. So I'm just going to roll over and just, you know, roll the  
24 dice on this, on this event, today, and see how it goes."* - **Tim**. *"I was home with chest  
25 pains. Not pain, but just pressure in my chest. Never for a minute, for a second, it clued in  
26 that I had a heart problem. On Thursday. I went back to work on Friday. Same pain, but  
27 when I sat down and rested, it went away. On Saturday I was home. I started my power  
28 saw to cut branches on trees and cut down a tree, and clean up the yard. And I only went  
29 to the doctor on Tuesday of the following week. Expecting to go there and he would say  
30 "Take a few tests and you'll go back home and we'll call you in a few weeks". Well, it  
31 changed. When he said "You're not going anywhere. You're going to be here a few days".  
32 And I realised I was stupid. I should've gone on Thursday."* - **Gary**  
33  
34  
35  
36  
37

38 Across discussions, two contrasting explanations for the denial reaction and delay in  
39 seeking help emerged: 1) the sense of invincibility perceived by younger men (30 to 50  
40 years old) as they did not see themselves at risk and could not understand/accept why  
41 they suffered a cardiac event: *"younger men are brought up to feel that they are a bit  
42 invincible, that you know, they're bullet proof and you know that doesn't happen to  
43 them"* - **Paul**, as well as by older men who had previously recovered from a severe illnesses  
44 such as a heart attack or a cancer and perceived themselves as warriors, *"I survived a  
45 cancer before, I haven't much of a fear of dying"* - **Pat** and 2) the sense of vulnerability  
46 expressed by men who described the cardiac event as a loss (of control, of power, of  
47 dignity and of autonomy) or a fear (of receiving a life-threatening diagnosis, of permanent  
48 incapacity/disability, of early retirement or of death). An additional explanation  
49 mentioned across groups, was the competing priorities of daily living and putting others  
50 above self *"it's hard to take time for yourself when you have a lot of obligations"* - **Marc**.  
51 Stressing on lack of time and being busy is used to positively explain and justify the  
52 treatment-seeking delay behaviour. This type of avoidance behaviour in regards to  
53 seeking help was often perceived as being somewhat of a responsible and altruistic  
54  
55  
56  
57  
58  
59  
60

1  
2  
3 behavior, thus making it more acceptable and meaningful and reinforcing the masculine  
4 gender role and its impact on engaging in help-seeking and treatment-seeking.  
5

### 6 7 **“What am I doing here? What’d be my life once I’m back home?”: The in-hospital** 8 **journey**

9  
10 The in-hospital stay, whose length varied according to the severity of the cardiac event,  
11 was most often described as very difficult, involving sleepless nights, worries, fear of  
12 death, and sometimes anger. Having to “stay in bed” was depicted as a failure, a loss of  
13 power and confidence, or an unfair situation. *“It changed my life totally. Like, you know,*  
14 *I was pretty confident, pretty, you know, I was a supervisor at my work, captain of my*  
15 *team, just, you know, that 10 feet tall and bulletproof. I wasn’t there anymore, right?”-*  
16 **Jacques** While reactions varied, one particular question transcended across groups:  
17 *“what would be my life once at home?”*. The anxiety generated by this question was  
18 discussed in groups as an important concern.  
19  
20  
21

22 Across groups, men typically shared that they were very satisfied with the care they  
23 received (i.e., procedures, medications, interactions with health professionals about their  
24 cardiac condition) during their hospital stay, but that one thing they tended to avoid  
25 discussing openly was their apprehension about life after hospitalization. Thus,  
26 uncertainty about life after hospitalization emerged as a dominant theme across groups  
27 when discussing in-hospital challenges. In-hospital uncertainty was further characterized  
28 by lack of, or inability to achieve a clear understanding about the cardiac event, its impact  
29 on the body and daily functioning, eventual impact on one’s job or employability, and  
30 risks in terms of survival (fear of death). The main reasons why men experienced anxiety  
31 in the form of uncertainty about the future were that they (a) did not understand, or  
32 accept, the cardiac event; (b) did not feel in control of their future (how things are going  
33 to evolve?); (c) were intimidated by unintelligible medical terminology and high-tech  
34 procedures; and (d) apprehended the adjustments and the changes to be implemented  
35 once at home. Uncertainty about the future was associated with lack of self-confidence  
36 and was exacerbated by poor health communication on the part of professionals and in  
37 some cases the patients themselves, who were often reticent to share their concerns or  
38 to ask questions. Communication behaviours on the part of health care providers such as  
39 speaking in general terms and referring to population statistics (as opposed to using more  
40 precise and personalized information), only communicating via short conversations in a  
41 shared room while the patients were in bed (as opposed to creating opportunities for  
42 asking questions in a more confidential environment), or providing unclear explanations  
43 using medical jargon (as opposed to clear explanations in lay terms), appear to play a  
44 critical role in generating and exacerbating feelings of uncertainty and apprehension  
45 about the future.  
46  
47  
48  
49  
50  
51

### 52 **“I’m not the man I used to be!”: Post-hospital discharge**

53  
54 Returning home following a cardiac event was discussed as an important transitioning  
55 phase. Group discussions revealed that being told to *“slow down and stay home,”* even  
56  
57

1  
2  
3 for a short period, was often experienced as unacceptable and devaluing. Post-hospital  
4 discharge, especially in the early going, was associated with psychological distress,  
5 frustration, and discomfort related to adopting the recommended lifestyle changes (e.g.,  
6 lower sodium intake, eating more fruits and vegetables, quitting smoking), resting at  
7 home, and daily medication intake. Lack of understanding of medical advice and  
8 recommendations, lack of preparedness for the changes to be implemented, and the  
9 experience of having had a “brush with death” were mentioned as major stressors.  
10  
11

12  
13 *“You know, the thing that stuck in my mind the most, of this whole episode... I talked to*  
14 *the surgeon before the operation, and he went through all the steps of what’s happening,*  
15 *and bottom line, there’s a 2% chance that you’re gonna die... That gets your attention”-*  
16 **Henry.** *“Like, this gentleman keeps saying “If it’s your time to go, it’s your time to go.” But*  
17 *for me, I’m not saying that I’m more or less important, but I have a young kid, so when*  
18 *your doctor tells you that you better make sure that your will is fully done and your*  
19 *financial situation is good cause you’re a ticking time bomb, at 40, I have a young kid and*  
20 *for me, it plays a lot in my head, right”-George.* *“What I found the hardest of all is before*  
21 *my operation and after, they told me what I could do, what I couldn’t” -Virgile*  
22  
23

24  
25 Perceived control was identified as a dynamic cognitive process that fluctuated in  
26 response to the cardiac event. Men constantly attempted to retain or gain control during  
27 the rehabilitation phase and even beyond this period. Changes in environmental  
28 circumstances, such as being hospitalized for extended periods of time, re-hospitalization  
29 for complications and then being discharged home, impinged directly on their ability to  
30 feel in control of their daily lives. The process of gaining a better sense of control was  
31 facilitated by rationalizing, or making sense of a new phase in their treatment or illness  
32 prognosis or by gaining awareness of environmental challenges *“once you accept that you*  
33 *are restricted in your physical abilities it gets easier”- Paul.*  
34  
35

36  
37 The post-hospital discharge and recovery process experience are mainly shaped by age,  
38 social connectedness (life partner, family, friends, and community involvement),  
39 psychological preparedness, personality, and economic status (finances, employment,  
40 etc.). Groups’ narratives revealed that feelings of powerlessness and sleep disturbances  
41 were experienced at all stages of the rehabilitation process and were often associated  
42 with the fear of dying. *“I was afraid for a long time to go to sleep. I would stay up for like*  
43 *three days until somebody slept with me more or less, right? My girlfriend at the time, we*  
44 *didn’t stay together every night, but if she wasn’t with me, I wouldn’t sleep. I was afraid*  
45 *to go to sleep and not wake up.”-Albert.*  
46  
47  
48

### 49 **3.2. Distancing, normalizing, and accepting**

50 Men reported that stepping back and reflecting on their own emotional reactions and  
51 experiences helped them making sense of their changing lives post-cardiac event. Two  
52 perspectives emerged : experiencing it as a personal failure and/or as an opportunity (a  
53 second chance for a better life). In both perspectives, they were ready to accept this new  
54 normality and were ready for adjustment. *“Once you accept that you are restricted in your*  
55  
56  
57

1  
2  
3 *physical abilities it gets easier*”-**Bernard**. They reported using various strategies  
4 (spirituality, religion, faith, praying, introspection, meditation) as means to help them  
5 make sense of their cardiac event and accept the situation “*Well, I wouldn’t say I was*  
6 *completely free of worry for myself. Like the day before surgery, I went up to Sainte-Anne-*  
7 *De-Beaupré and I went to confession. So I was, you know. I wasn’t completely fearless,*  
8 *going in*”-**Paul**. “*Well you know there’s a lot of factors that impact on getting better*  
9 *support, prayer... I think prayer is a big thing, faith is a big thing too, you need to go for*  
10 *help*”-**Jack**. “*Spirituality helps, it gives you strenghts and courage. I think it’s a*  
11 *psychological thing*”-**Marc**.

12  
13  
14  
15 Increased awareness of one’s mortality was described as a motivating factor to help them  
16 prioritize taking charge of their health. Redefining priorities with their life partner and  
17 family, or engaging in companionship was also described as helpful “*My wife as well was*  
18 *very helpful, which means, she was not entirely too sympathetic which is, this is what you*  
19 *need to do, you know (laughs).*”-**Patrick** “*Like she took care of all my meds. Prior to the*  
20 *surgery, she wouldn’t even know what meds I was on. But after that, she was the one who*  
21 *knew what med, and when there were changes*”- **Albert**.

22  
23  
24 After being stabilized medically, reactions varied among men. Groups discussed three  
25 main reactions: (a) processing and reflecting on the lived experience and engaging in  
26 adopting a healthy lifestyle as a personal or familial challenge, (b) taking the necessary  
27 time to process the traumatic event (to absorb the shock and understand what was  
28 happening) and then gradually exploring options and implementing changes, and (c)  
29 resisting and ignoring recommendations, using self-reliance and continuing the same  
30 lifestyle as before the cardiac event. “*I disregarded anything that my doctors were telling*  
31 *me, and I said that I had to take control of my own situation.*”-**Charles**

### 3.3. Conformity to traditional masculine norms

34  
35  
36 Dominant masculine norms can affect perceptions, acceptance, and normalization of the  
37 psychological distress following a cardiac event as well as help-seeking behaviours and  
38 mental health services utilization. The “*broken masculinity or the phallic devaluation*”  
39 emerged as a transversal theme illustrating how deeply “*masculinity and virility*” were  
40 affected following a cardiac event. The functional limitations (i.e. staying at home, not  
41 driving, not shovelling snow, not lifting heavy weights), prescribed by their doctor or that  
42 were consequences of their heart condition (i.e. erectile dysfunction), were experienced  
43 as a major loss of manhood “*Well, weakness also. There’s a role. You’re the father, and*  
44 *there’s a role. And there’s responsibilities that go with that role. And you want to continue*  
45 *to do your job, as a father. And you don't want to show them that you’re as vulnerable as*  
46 *you are at the moment. You kind of try to carry through. Which is tiring, cause then when*  
47 *they’re gone, you’re just wiped out. You just put everything. You put the whole day’s*  
48 *energy into that session with them.*” – **Jean-Pierre**. Perceiving their social role as “*family*  
49 *breadwinner*” or “*family strong pillar*” prevented men from sharing their emotions and  
50 worries to their children or relatives. The altruistic behaviors, such as protecting relatives  
51 from worries, are valued by men and are used as intrinsic strategies to regain self-  
52 confidence and sens of manhood. “*Well, I have a 14 year old son, who looks up to me*  
53  
54  
55  
56  
57

1  
2  
3 *I'm sure. I'm his father. So, you know, sometimes when I'd see him, surely, I'd say after the*  
4 *surgery when you're really not feeling yourself... You have to put on a game face because*  
5 *you really don't want to show exactly how you feel to your children, cause they're going*  
6 *to worry."* - **Brian**.

8  
9 The tendency to view and label certain behaviours as "*feminine*" as opposed to  
10 "*masculine*" seems to be an aggravating factor in terms of delaying or avoiding seeking  
11 help and using mental health services "*...women will tend much more to talk about it to*  
12 *their friends in regards to how they're feeling. Where a man, sometimes it's hard to share*  
13 *with your partner sometimes. You don't want to show that sign of weakness, and that's*  
14 *the way that I look at it."* – **Bill** "*Suddenly you go through a heat attack and you will be*  
15 *like that (clic) the man they expect you to be, I mean the open minded... the touchy feel...*  
16 *you know... talking about private things... with people you don't know, Oh wow! Not*  
17 *me..."*-**Greg** "*I find that women will talk to each other about emotions and how they feel.*  
18 *But how often do you go to work and sit down with one of your friends and start talking*  
19 *about your emotional problems? Not often. It's just something that men don't do"*-**Alban**

20  
21  
22  
23 Men working in male-dominated workplaces (i.e., paramedics, police, military,  
24 construction, fishery industry) stressed the importance of educating people in their  
25 workplaces and of providing them with supportive tools and strategies. "*The other thing*  
26 *too is like, in the military, I was trained for 32 years to be macho. There's no such thing as*  
27 *being depressed or tired or... you know what I mean? You'd just go out and do your thing,*  
28 *that's just the way it was. And that training, today, is still instilled in me."*- **Martin**.

### 31 **3.4. Social, literacy, and communication challenges**

32  
33  
34 Following a cardiac event, men had to change the patterns of their lives and adjust to  
35 changes in their role as life partners, parents, and employees. There was a perception of  
36 loss of confidence in their physical capabilities and functioning in family and work  
37 relationships. Low social connectedness and support before the cardiac event was  
38 discussed in groups as a risk factor for cardiac disease and mental illness and associated  
39 with poor mental functioning and quality of life during the recovery period. The quality  
40 and the intensity of the familial relationships as well as friends and co-workers  
41 relationships vary over the course of recovery from the cardiac event and are dependant  
42 on men's acceptance of the situation and for help. Following a cardiac event, men had to  
43 change the patterns of their lives and to adjust to different changes in their role as life  
44 partners, parents and employees. The perceived loss of confidence in their bodily  
45 capabilities and functioning affecte their family, friend and work relationships. When  
46 discussing about social support and its relevance for a healthy recovery, the necessary  
47 balance between the expected and the received support emerged as key. Indeed, while  
48 they found it sometimes difficult to share their thoughts and challenges with their  
49 relatives, men appreciated the attention, the compassion, the understanding and the  
50 support of their life partner, family members and friends. Supportive interpersonal  
51 relationships were viewed as helpful for breaking the cycle of distress and anxiety. The  
52 support received improved men's trust in their ability to deal with the cardiac event, the



1  
2  
3 cardiac rehabilitation and the necessary adjustments. However, men mentioned being  
4 irritated because of the overprotectiveness of their relatives. In particular, being under  
5 'spouse's management', they felt that they had lost part of their personal space, their  
6 independence and manhood. '*...All of a sudden, people feel, my wife in particular, well,*  
7 *here's somebody who's not an invalid, but we have to, you know, every time you do*  
8 *anything it's well, you shouldn't be doing this, you shouldn't be doing that, you shouldn't*  
9 *be... And that sort of affected me – it still does – more than any other things...'* – **Mark**.

12 Sexual problems developed in the aftermath of the cardiac event, either functional ones  
13 related to their ability to sustain an erection or to ejaculate (often side-effects of  
14 medications), or psychological ones that involved fears of exacerbating their heart  
15 condition if they were to engage in sexual activity were described as a major concern.  
16 "Sexually, I'm not the man I used to be. It's just – and I blame it on the pills – it's just that  
17 my life has changed drastically...I keep toying with the idea that maybe I should stop  
18 taking the pills, but I know that it's gonna get me one way or the other... So... it's really  
19 finding a sweet spot with the right medication."-**Wayne** "you don't have anymore the  
20 sexual drive, you know, that you had before"-**Martin**

### 24 Concerns about work

25 As work is a significant aspect of personal and social identity, being on a long term sick  
26 leave may lead to feeling of shame and guilt or regarded as incompetent, incapable or  
27 physically weak. "I've been out of work for a year and a half. I don't want to go back there.  
28 I don't want the stress of it. In the meantime, my work's moving, so we're all going to lose  
29 our jobs anyways. I've been there 22 years. So it's just another stressor, right? And a lot of  
30 stuff outside of work, and it's a helpless feeling."-**Paul**. "I supervised like the Giant Tiger  
31 warehouse. I couldn't do that anymore. You know what I mean? Stuff like that, you know?  
32 The only thing I do anymore is play baseball. That's just it..."-**Richard**. Early returning to  
33 work, even against medical advice, is discussed as a problem-solving strategy to reinforce  
34 self-confidence and overcome stress. "The cardiologist came, he says, "well, we have to  
35 do a triple bypass". I looked at him, I said, "well, how long am gonna have to stay in the  
36 hospital?". He said, "two weeks". I says, "I don't have time for that. I have to be back at  
37 work for the 29th"-**Serge** "after my heart attack, the only thing I wanted to do was get  
38 better so I could go back to work, 'cause I'm only 52 and I need to work. So, that's all  
39 about"-**Georges**

### 45 Health literacy, health communication and health services navigation

46 Men's health literacy was pointed out as a major challenge. The lack of understanding of  
47 the medical jargon and procedures emerged as an additional stressor and was described  
48 as a barrier for asking questions and seeking for more information, explanations, or  
49 advice. The bidirectional association between cardiac health and mental health was  
50 unclear and not fully understood. Moreover, the mental illness signs, symptoms and  
51 diagnostic labels seem to interfere with the masculine ideals. Indeed, men did not identify  
52 themselves as "depressed", "stressed" or "anxious" but used restrictive vocabulary to  
53  
54  
55  
56  
57  
58  
59  
60

1  
2  
3 express emotional distress like “low energy”, “challenged” or “meeting temporary  
4 difficulties”.

5  
6 Men valued the quality and human kindness associated with health services they had  
7 access to and described how the interactions, the conversations and the alliance they had  
8 with their healthcare providers enhanced their compliance with treatment plans and  
9 improved their general mental and physical health status. “...*They gave me all the*  
10 *paperwork, all the stress things, charts and stuff, and my GP was great. She would ask me*  
11 *how my mental state was. I don’t know guys like that. I appreciate it, but my doctors know*  
12 *her when I go in her office. She’s in no hurry. If I’m sitting there crying for 15 minutes, she’s*  
13 *there for 20 with me. So, yeah, I’m very lucky. I have great doctors...*” - **Serge**

14 Men put a strong emphasis on the quality of the communication they had with the health  
15 professionals, such as being listened to, not being rushed, receiving care with sympathetic  
16 attitude, being trusted and taken seriously “*I feel comfort. I feel comforting going to them.*  
17 *I really get a sense of my doctors that they really care about me.*”-**William**.

18  
19 However, the lack of time allocated by physicians for talking about emotional distress  
20 and social challenges following the cardiac event was reported as a barrier for access to  
21 supportive and caring services “*You look at the doctor as being event-centered. In other*  
22 *words, he’s there for a medical purpose. You have your 10 or your 15 minutes, and*  
23 *you’re gone. You know, we’re talking today about emotions, and this seems to be a time-*  
24 *consuming expensive exercise that at least the professionals I’ve dealt with haven’t been*  
25 *available for. And you feel as though you’re intruding on their importance, I guess, by,*  
26 *you know, having long chats and that sort of thing.*”-**Patrick**. Men felt pressured by  
27 time “*I just felt like I was just in and out like I was at a hair salon or something. You know,*  
28 *get this done, get the ECG done, and okay, see you later. Here’s a prescription... I always*  
29 *felt like I was being rushed and brushed off. And so there was no relationship*”-**Mike**.  
30 “*You know, you’ve got your so many minutes. And I still think in our health system – and*  
31 *maybe not what’s in the future – but if there was some minor pay for service, I think that*  
32 *would be helpful because you always feel you’re on a sort of a diet of service. You’re in;*  
33 *you’re out, and of necessity. They move on to the next person.*”-**Bruce**.

34  
35 The lack of knowledge about the health system and how to navigate services and  
36 manage medical information making the health system perceived as a “men-unfriendly  
37 space” where they feel uncomfot and uncertainty “*I think there’s a problem with men*  
38 *as a whole, and you know, women seem so much more in tune with, you know, going to*  
39 *see the doctor for themselves, child birth, kids, I mean, when my son was ill, I never went*  
40 *to the doctor with him, my wife took him and it just wasn’t a place I’d go; didn’t know*  
41 *him very well, didn’t know much about what to tell him*”-**Philip**. Moreover, the perceived  
42 conflicting information received from different health professionals increased anxiety  
43 and stress on how to manage health condition and how to use health services. Men  
44 participating in cardiac rehabilitation programs reported the benefits of social  
45 interaction with cardiac fellows, identified as the “*cardiac family*”, sharing similar health  
46 condition that helps normalizing the challenges and accepting the “*new reality*”.

#### 4. Discussion

This study aimed to describe the emotional issues and patterns of psychosocial adjustment experienced by men following a cardiac event. Across the three provinces, participants showed homogeneity in reported experiences of the cardiac event, and its subsequent psychological reaction and social impact. Adaptation to the event, both psychologically and socially, did not appear to relate to the geographical location but varied by severity of the initial event, socioeconomic status, age and cultural norms and beliefs. In the focus groups men opened up readily about their emotions and their vulnerabilities. They shared their experiences of difficulties in adapting and adjusting to their “new post-cardiac identity” and the need to accept new roles. They acknowledged that this adjustment needed to be worked out with their environment, their home, their family, their friends, and their workplace. Most often they found support through their partners and through peer support when they attended cardiac rehabilitation sessions. The focus groups sessions helped to validate and normalize their initial reactions. They regretted that the health professionals they had encountered had not enquired in a systematic way about their mental well-being as they would about their physical symptoms or diet or exercise. One important overarching element that was brought forth by men was the lack of systematic attention given by health care professionals to the psychological consequences of having experienced a cardiac event. It was suggested that some professionals may bring up the subject, but in most instances, the question was not asked. Therefore, there seems to be a lack of consistency within the health system in regards to the attention paid to the psychological sequelae of heart disease. These aspects were reported in previous studies on various health conditions [18–20]. However, there still a lack of clear and evidence-based guidelines and resources to support men-sensitive health communication as well as clinical practices to foster men’s mental health. This study also revealed how traditional masculine norms can affect the way men experience and seek help for emotional distress following a cardiac event, and how these behaviour affect their health and wellbeing. Tailoring and targeting clinical interventions may increase men's service uptake and the efficacy of treatments. Specific factors associated with men's access to, and engagement with mental health care are critical to increasing help-seeking, treatment uptake, and effectual self-management among men experiencing emotional distress following a cardiac event.

While the literature contains extensive reports on “toxic masculinity” as a major determinant of men’s health [21] or its impact on help-seeking in men [22], our study revealed “broken masculinity” to be an untold and unrecognized distress following a cardiac event. We found that men experienced a great deal of psychological anguish over the changes imposed by their cardiac illness, and that these changes were directly related to their sense of themselves as men in their family and in society. Our results confirm, as suggested by previous research, that it will be crucial to address these concerns in a systematic way in order to combat symptoms of depression, anxiety, and post-traumatic stress in men following a cardiac event [23,24].



### Limitations

Our sample was limited but we reached information and conceptual saturation. Our participants were mostly in their sixties and over, which is representative of the population of men with cardiac disease. However, it would be of interest to study more specifically cardiac disease in men in their 30s, 40s or 50s as these population is growing among cardiac men.

The participants in our study were essentially white, with little or no representation of other ethnic groups nor indigenous people. This may not be representative of larger urban Canadian settings.

Although our inclusion criteria indicated a cardiac event in the last 5 years, for some participants, the first event may have occurred some 10 years prior and there may have been changes in cardiac rehabilitation programs and health services. Moreover, the responsiveness of health professionals at the time may have been different. A quantitative study exploring these aspects may allow to retrieve accurate information.

### Strengths

This study is the first of its kind to delve into the subjective experience of men with heart disease and to examine the link between their reactions to their cardiac event and their mental health. We were able to detect key themes that are likely to resonate with most men who have heart disease, which could serve as a foundation for the development of intervention programs, i.e. the stepped-care model.

## 5. Conclusion

This paper highlights the significant emotions that arise following a cardiac event and how men attempt to counter them as best as they can. It is known that men have a tendency not to talk about their emotions or to express them differently than women do. Health professionals caring for men in these contexts must be aware of this and receive training in gender-sensitive approaches. It will be important to inform their patients of the possible occurrence of such emotions as well as the tools and resources to self-manage as a first step. Considering the impact on morbidity and mortality when anxiety, depression, or post-traumatic stress are in the diagnostic picture, cardiologists, cardiac surgeons and family physicians as well as psychologist and other health professionals involved in cardiac rehabilitation programs must be ready to inquire systematically and to screen their patients for common mental health conditions. Improved mental health of these patients will most likely improve their cardiac disease. A larger study is underway to longitudinally investigate the need for emotional support among men following a cardiac event as well as exploring acceptability and feasibility of men-sensitive stepped-care models.

**Ethical approval** The study received ethical approval from the research ethics boards (REB) of the participating study sites: Réseau de santé horizon : 2016-2295; Réseau de

1  
2  
3 santé Vitalité : 2016-04-13; Université de Moncton : 1516-047; Hospital Montfort : JJ-04-  
4 11-15; Institut de recherche cardiologie d'Ottawa : 2014-1801 (#projet), formulaire F11-  
5 4318; Université de Montréal : MP-33-2016-2006 (# projet), demande # F0-7529; and  
6 Hôpital de Hull : 2016-159 (# projet). All participants signed a confidentiality and consent  
7 form.  
8  
9

10 **Acknowledgements** The authors would like to thank the staff of the participating cardiac  
11 rehabilitation programs for their support with men recruitment, and the research staff  
12 (Arielle Doiron, Lise Gallant, Sarah Nowlan, and Mireille Ntambwe) for their contribution  
13 in the transcription of verbatims, the data organization and the preliminary coding. The  
14 authors would also like to thank the men who have contributed to the focus groups and  
15 semi-structured interviews.  
16  
17

18 **Funding** This paper represents independent research, for which authors received funding  
19 from the Movember Foundation-Canada and from the New Brunswick Health Research  
20 Foundation. JJ would also like to acknowledge the logistic and financial support provided  
21 by the Centre de formation médicale du Nouveau-Brunswick to support this publication.  
22  
23

24 **Competing interests** None declared.  
25  
26  
27  
28  
29  
30  
31  
32  
33  
34  
35  
36  
37  
38  
39  
40  
41  
42  
43  
44  
45  
46  
47  
48  
49  
50  
51  
52  
53  
54  
55  
56  
57  
58  
59  
60

## BIBLIOGRAPHY

1. Tully PJ, Cosh SM, Baumeister H. The anxious heart in whose mind? A systematic review and meta-regression of factors associated with anxiety disorder diagnosis, treatment and morbidity risk in coronary heart disease. *Journal of Psychosomatic Research*. 2014.
2. Greenman PS, Viau P, Morin F, Lapointe-Campagna MÈ, Grenier J, Chomienne MH, et al. Of Sound Heart and Mind: A Scoping Review of Risk and Protective Factors for Symptoms of Depression, Anxiety, and Posttraumatic Stress in People with Heart Disease. *J Cardiovasc Nurs*. 2018;33(5):E16–28.
3. Jankowska K, Jacek P, Jankowski K. Psychocardiology - forgotten science in the service of cardiovascular disease prophylaxis Paula Katarzyna Jankowska 1 , Krzysztof Jacek Jankowski 1 , Ewa Rudnicka- Drożak 1 1 Chair and Department of Family Medicine, Medical University of Lublin. 2018;8(5):160–8.
4. Van Straten A, Hill J, Richards DA, Cuijpers P. Stepped care treatment delivery for depression: A systematic review and meta-Analysis. *Psychol Med*. 2015;45(2):231–46.
5. van der Feltz-Cornelis CM, Nuyen J, Stoop C, Chan J, Jacobson AM, Katon W, et al. Effect of interventions for major depressive disorder and significant depressive symptoms in patients with diabetes mellitus: A systematic review and meta-analysis. *Gen Hosp Psychiatry [Internet]*. Elsevier Inc.; 2010;32(4):380–95. Available from: <http://dx.doi.org/10.1016/j.genhosppsy.2010.03.011>
6. Davidson KW, Bigger JT, Burg MM, Carney RM, Chaplin WF, Czajkowski S, et al. Centralized, stepped, patient preference-based treatment for patients with post-acute coronary syndrome depression: CODIACS vanguard randomized controlled trial. *JAMA Intern Med*. 2013;173(11):997–1004.
7. Kronish IM, Rieckmann N, Burg MM, Edmondson D, Schwartz JE, Davidson KW. The effect of enhanced depression care on adherence to risk-reducing behaviors after acute coronary syndromes: Findings from the COPES trial. *Am Heart J [Internet]*. Mosby, Inc.; 2012;164(4):524–9. Available from: <http://dx.doi.org/10.1016/j.ahj.2012.07.024>
8. Galdas PM, Harrison AS, Doherty P. Gender differences in the factors predicting initial engagement at cardiac rehabilitation. *Open Hear [Internet]*. 2018;5(1):e000764. Available from: <http://openheart.bmj.com/lookup/doi/10.1136/openhrt-2017-000764>
9. Samayoa L, Grace SL, Gravely S, Scott LB, Marzolini S, Colella TJF. Sex differences in cardiac rehabilitation enrollment: A meta-analysis. *Can J Cardiol [Internet]*. Canadian Cardiovascular Society; 2014;30(7):793–800. Available from: <http://dx.doi.org/10.1016/j.cjca.2013.11.007>

10. Angus JE, King-Shier KM, Spaling MA, Duncan AS, Jaglal SB, Stone JA, et al. A secondary meta-synthesis of qualitative studies of gender and access to cardiac rehabilitation. *J Adv Nurs*. 2015;71(8):1758–73.
11. Yin RK. *Case study research: Design and methods*. Thousand Oaks; CA: Sage Publications; 2013.
12. Smith JA. *Qualitative psychology: A practical guide to research methods*. 3rd ed. Los Angeles: Sage Publications; 2015. 301 p.
13. Tong A, Sainsbury P, Craig J. Consolidated criteria for reporting qualitative research (COREQ): a. *Int J Qual Heal Care* [Internet]. 2007;19(6):349–57. Available from: <http://intqhc.oxfordjournals.org/content/19/6/349.abstract><http://dx.doi.org/10.1093/intqhc/mzm042><https://www.ncbi.nlm.nih.gov/pubmed/17872937> %0AAll Papers/T/Tong et al. 2007 - Consolidated criteria for reporting qualitative research (COREQ) - a 32-item checklist for interviews and focus groups.pdf
14. Rodham K, Fox F, Doran N. Exploring analytical trustworthiness and the process of reaching consensus in interpretative phenomenological analysis: lost in transcription. *Int J Soc Res Methodol* [Internet]. 2015;18(1):59–71. Available from: <http://web.a.ebscohost.com.libproxy.boisestate.edu/ehost/pdfviewer/pdfviewer?vid=1&sid=a0afd31c-7f55-4b49-a60d-b7e066912a97%40sessionmgr4010>
15. Eatough V, Smith JA. Interpretative phenomenological analysis. In: *Handbook of Qualitative Research in Psychology*. SAGE Publications Ltd; 2017. p. 193.
16. Miles MB, Huberman AM, Saldana J. *Qualitative Data Analysis: A Methods Sourcebook*. 3rd ed. Arizona State University, USA: Sage Publications Inc.; 2014. 408 p.
17. Gwet KL. *Handbook of inter-rater reliability: The definitive guide to measuring the extent of agreement among raters*. 4th ed. Advanced Analytics; LLC.; 2014.
18. Punjani N, Flannigan R, Oliffe JL, McCreary DR, Black N, Goldenberg SL. Unhealthy Behaviors Among Canadian Men Are Predictors of Comorbidities: Implications for Clinical Practice. *Am J Mens Health*. 2018;12(6):2183–93.
19. Thorne S, Hislop TG, Kim-Sing C, Oglov V, Oliffe JL, Stajduhar KI. Changing communication needs and preferences across the cancer care trajectory: Insights from the patient perspective. *Support Care Cancer*. 2014;22(4):1009–15.
20. Paterson C, Robertson A, Smith A, Nabi G. Identifying the unmet supportive care needs of men living with and beyond prostate cancer: A systematic review. *Eur J Oncol Nurs* [Internet]. Elsevier Ltd; 2015;19(4):405–18. Available from: <http://dx.doi.org/10.1016/j.ejon.2014.12.007>

- 1  
2  
3  
4  
5  
6  
7  
8  
9  
10  
11  
12  
13  
14  
15  
16  
17  
18  
19  
20  
21  
22  
23  
24  
25  
26  
27  
28  
29  
30  
31  
32  
33  
34  
35  
36  
37  
38  
39  
40  
41  
42  
43  
44  
45  
46  
47  
48  
49  
50  
51  
52  
53  
54  
55  
56  
57  
58  
59  
60
21. Elliott K. Challenging toxic masculinity in schools and society. *Horiz.* 2018;26(1):17–22.
  22. Seidler ZE, Dawes AJ, Rice SM, Oliffe JL, Dhillon HM. The role of masculinity in men’s help-seeking for depression: A systematic review. *Clin Psychol Rev* [Internet]. Elsevier B.V.; 2016;49:106–18. Available from: <http://dx.doi.org/10.1016/j.cpr.2016.09.002>
  23. Galdas PM, Johnson JL, Percy ME, Ratner PA. Help seeking for cardiac symptoms: Beyond the masculine-feminine binary. *Soc Sci Med* [Internet]. Elsevier Ltd; 2010;71(1):18–24. Available from: <http://dx.doi.org/10.1016/j.socscimed.2010.03.006>
  24. Galdas P, Darwin Z, Kidd L, Blickem C, McPherson K, Hunt K, et al. The accessibility and acceptability of selfmanagement support interventions for men with long term conditions: A systematic review and meta-synthesis of qualitative studies. *BMC Public Health.* 2014;14(1).

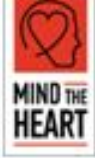

## APPENDIX 1

### « MIND THE HEART » PROJECT

#### FOCUS GROUP DISCUSSION GUIDE

##### ENGLISH VERSION

### INTRODUCTION

Thank you for agreeing to participate in this focus group discussion. This discussion is part of a multi-site participatory action research project, « MindTheHeart », funded by Movember Foundation Canada and the New Brunswick Health Research Foundation that aims at raising awareness for psychologically healthy workplaces for men living with or at risk of HD.

The purpose of this focus group is for the research team to understand the needs, expectations and preferences of men at risk of or living with HD, with regard to interventions such as mental health promotion, mental health prevention, and mental health interventions for MD/AD/TRD. The information gathered will help the research team to design interventions that meet the specific needs of men with HD to prevent or early detect and treat co-occurring mental health issues.

Before we start the discussion, allow us to clarify some points.

1. Could you all kindly verify that you have already signed the consent forms stating your voluntary participation in this focus group?

Yes

No

2. The duration of the focus group discussion will take 90 to 120 minutes in which you have the right to leave the group at any point in time.
3. The whole session will be audio recorded to ensure the accuracy of the information that you provide. However the consent forms that you have signed will ensure that all the information that you share today shall be confidential and anonymous.
4. Please note that each of you confirms that you are aware that anything said during the meeting has to be kept confidential and that you understand that you are not allowed to disclose any information or any names related to this focus group.

Would anyone like to ask any question or has any clarification related to this focus group before we start?

Before we start, could you please take a few minutes to complete this general information sheet? (Give them the information sheet below)

Date: \_\_\_\_\_

**The objective of the following form is to collect general information about you. You can be assured that the information collected will remain confidential and anonymous.**

- 1- Age
- 2- City of residence
- 3- Familial status (tick as apply).
- Single (never married)
- Married
- Common law partner
- Divorced
- Widow
- Other (specify): \_\_\_\_\_.
- 4- Level of education: (tick as apply).
- Not schooled
- Primary
- Secondary
- College
- University
- Other (specify): \_\_\_\_\_.
- 5- Employment status: (tick as apply).
- Employed
- Retired
- Sick leave
- 6- Preferred language for health services (tick all that applies).
- French
- English
- Others (specify): \_\_\_\_\_.
- 7- What is your ethnicity? (tick all that applies).
- White/Caucasian
- Black (ex., Haitian, African, Jamaican, Somalia)
- Latino/Hispanic
- Asiatic (ex., Chinese, Japanese, Vietnamese)
- Middle East
- Native/First Nation/Mixed-Race
- Pacific Island
- Other (specify): \_\_\_\_\_.

#### Health status

- 1- Are you suffering from, have you ever suffered from or are you at risk of heart disease?  
(if yes, please specify)
- 2- Are you suffering from a mental health issue?  
(if yes, please specify)



## FOCUS GROUP DISCUSSION GUIDE

### A. Patient Experience

How would you describe your experience with the mental health issues that you have been experiencing following your HD?

- Physical well-being (performing your daily activities, energy levels and physical activity)
- Emotional well-being (interest in sex, experienced feelings, mood and relationships with others)
- Mental health issues (mood and anxiety, ability to make 'good' decisions and be productive)
- Financial situation
- Employment situation (absence from work, productivity, demotions, arguments with colleagues and supervisors, stigma, loss (advantages, respect, confidence...))
- For many men, self-reliance and being competitive are important characteristics. How about you? What are important manly characteristics for you? How might that have changed with HD and mental health issues?
- How do you deal with those changes?

### B. Health Promotion and Prevention Needs

What do you know about the link between HD and mental health issues in men?

- Health literacy/Knowledge/Health education
- What do you wish you had known or done that might have helped you avoid HD and mental health issues?
- For other men experiencing HD and mental health issues, what are the most important pieces of information about the link between HD and mental health issues and how might they be best conveyed?

Regarding risk reduction for HD and mental health issues: What kind of information about mental health and HD do you think will be most useful for you?

- Type of information (statistics, recommendations, health advice, explanations...)
- Communication channels: (read, audio or visual media, seminars, peer education, educational materials, others specify...)
- Location of information delivery (workplace, health care services, community, media)
- Timeliness of information delivery (moment/delay)
- Websites, apps, social media, men testimonies as a source of information, interest and use

### C. Health Services and Clinical Care

What is your experience with the health care that you were provided due to your HD and mental health issues needs in the last five years?

- How connected are you to the health care system and specialist heart and mental health services?
- Relevance of care: Many men tell us they don't want to rely on medications to ensure their mental health or treat specific ailments such as depression? What is your perspective/experience? What is your advice to health care providers about working with male patients who have experienced HD and/or mental health issue?
- Utilization of services: Lots of men are reticent to use professional mental health services – why might that be? What about you, what challenges did you have in seeking heart or mental health care?
- Availability and access to care? (existence of men-sensitive services, factors related to utilization of services: psychologist, insurance coverage, social services...)
- What were some of the areas that you suggest be improved? (your expectations)

Could you please describe your experience with your health care professional (family doctor, cardiologist, nutritionist, kinesiologist, social worker, psychologist, and counselor) regarding information about mental health issues and heart disease?

- Information/Education provided: What type of patient are you? One who likes to be told what to do or would you rather be more involved in the decision making and strategies? Please provide an example of that round your HD and/or mental health issues?
- Perceived expectations and needs
- Patient/Clinicians dynamics (communication, relationship, openness, empathy and shared-decision making)
- Proposed improvements: Can you provide an example of a positive interaction/relationship with a specific health care professional? What are the characteristics of a great health care professional?
- How does the gender of the health care professional influence that relationship?
- Some men like to lead – others like clear instructions. What is your preference and experience of interacting with health care professional?



## Consolidated criteria for reporting qualitative studies (COREQ): 32-item checklist

Developed from:

Tong A, Sainsbury P, Craig J. Consolidated criteria for reporting qualitative research (COREQ): a 32-item checklist for interviews and focus groups. *International Journal for Quality in Health Care*. 2007. Volume 19, Number 6: pp. 349 – 357

**YOU MUST PROVIDE A RESPONSE FOR ALL ITEMS. ENTER N/A IF NOT APPLICABLE**

| No. Item                                       | Guide questions/description                                                                                                                                                                                                                                                                                 | Reported on Page #                                  |
|------------------------------------------------|-------------------------------------------------------------------------------------------------------------------------------------------------------------------------------------------------------------------------------------------------------------------------------------------------------------|-----------------------------------------------------|
| <b>Domain 1: Research team and reflexivity</b> |                                                                                                                                                                                                                                                                                                             |                                                     |
| <i>Personal Characteristics</i>                |                                                                                                                                                                                                                                                                                                             |                                                     |
| 1. Interviewer/facilitator                     | All authors conducted the focus group or the semi-structured interview                                                                                                                                                                                                                                      | Method- Page4                                       |
| 2. Credentials                                 | JJ PhD, MD<br>JG PhD, CPsych<br>MHC MSc, MD<br>FT PhD, LPsych<br>HT CPsych<br>BD'A PhD<br>PSG PhD, CPsych                                                                                                                                                                                                   | Title page-1                                        |
| 3. Occupation                                  | What was their occupation at the time of the study? Researchers, Clinicians or both.                                                                                                                                                                                                                        | -                                                   |
| 4. Gender                                      | Was the researcher male or female? Males (JG, PSG) and Females (JJ, MHC, FT, HT, BD'A)                                                                                                                                                                                                                      | -                                                   |
| 5. Experience and training                     | What experience or training did the researcher have? A MindTheHeart manual for the qualitative study was developed. Training was offered to the researchers and the research staff involved in this study.                                                                                                  | Methods-Page 5                                      |
| <i>Relationship with participants</i>          |                                                                                                                                                                                                                                                                                                             |                                                     |
| 6. Relationship established                    | Was a relationship established prior to study commencement? No                                                                                                                                                                                                                                              | -                                                   |
| 7. Participant knowledge of the interviewer    | What did the participants know about the researcher? Ethical approval had been granted from REB in all participating sites.<br><br>Participants reviewed the project's information sheet and had the opportunity to ask their questions to the interviewers prior to giving their written informed consent. | Ethical approval-<br>Page 15-16<br><br>Method-Page4 |

|                                          |                                                                                                                                                                                                                                                                                                                                                                                                                                                                                  |                |
|------------------------------------------|----------------------------------------------------------------------------------------------------------------------------------------------------------------------------------------------------------------------------------------------------------------------------------------------------------------------------------------------------------------------------------------------------------------------------------------------------------------------------------|----------------|
| 8. Interviewer characteristics           | What characteristics were reported about the inter viewer/facilitator? e.g. Bias, assumptions, reasons and interests in the research topic<br>No interviewer-related bias was identified.                                                                                                                                                                                                                                                                                        | -              |
| <b>Domain 2: study design</b>            |                                                                                                                                                                                                                                                                                                                                                                                                                                                                                  |                |
| <i>Theoretical framework</i>             |                                                                                                                                                                                                                                                                                                                                                                                                                                                                                  |                |
| 9. Methodological orientation and Theory | What methodological orientation was stated to underpin the study? e.g. grounded theory, discourse analysis, ethnography, phenomenology, content analysis<br>Open and axial coding with interpretative phenomenological analysis.                                                                                                                                                                                                                                                 | Methods-Page 5 |
| <i>Participant selection</i>             |                                                                                                                                                                                                                                                                                                                                                                                                                                                                                  |                |
| 10. Sampling                             | How were participants selected? e.g. purposive, convenience, consecutive, snowball<br>Convenience samples<br>The inclusion criteria were: 1) to be 19 and over in New-Brunswick, and 18 and over in Ontario and Quebec; 2) to have had a myocardial infarction, unstable angina, or heart surgery in the last 5 years with or without depression, anxiety or PTSD; 3) to be able to read and speak English or French; and 4) to be willing to participate in a group discussion. | Methods-Page 4 |
| 11. Method of approach                   | How were participants approached? e.g. face-to-face, telephone, mail, email<br>To recruit participants we used a combination of active strategies (patients' solicitation at participating cardiac rehabilitation programs and a snowball technique) and passive strategies (radio broadcasts and local newspapers advertisement).                                                                                                                                               | Methods-Page 4 |
| 12. Sample size                          | How many participants were in the study?<br>93 men                                                                                                                                                                                                                                                                                                                                                                                                                               | Results-Page 5 |
| 13. Non-participation                    | How many people refused to participate or dropped out? Reasons?                                                                                                                                                                                                                                                                                                                                                                                                                  | -              |
| <i>Setting</i>                           |                                                                                                                                                                                                                                                                                                                                                                                                                                                                                  |                |
| 14. Setting of data collection           | Where was the data collected? e.g. home, clinic, workplace<br>At the University or the hospital                                                                                                                                                                                                                                                                                                                                                                                  | Methods-Page 4 |
| 15. Presence of non-participants         | Was anyone else present besides the participants and researchers? No                                                                                                                                                                                                                                                                                                                                                                                                             | -              |
| 16. Description of sample                | What are the important characteristics of the sample? e.g. demographic data, date<br>Data presented in a Table (Table 1)                                                                                                                                                                                                                                                                                                                                                         | Results-Page 6 |

|                                        |                                                                                                                                                                                                                                       |                                      |
|----------------------------------------|---------------------------------------------------------------------------------------------------------------------------------------------------------------------------------------------------------------------------------------|--------------------------------------|
| <i>Data collection</i>                 |                                                                                                                                                                                                                                       |                                      |
| 17. Interview guide                    | Were questions, prompts, guides provided by the authors? Yes<br><br>Was it pilot tested? The guide was reviewed by four patients who did not participate to the study.                                                                | Appendix1 Guide<br><br>Method-Page 4 |
| 18. Repeat interviews                  | Were repeat inter views carried out? If yes, how many? No                                                                                                                                                                             | -                                    |
| 19. Audio/visual recording             | Did the research use audio or visual recording to collect the data? Audio                                                                                                                                                             | Methods-Page 4                       |
| 20. Field notes                        | Were field notes made during and/or after the inter view or focus group? Yes                                                                                                                                                          | Methods-Page 5                       |
| 21. Duration                           | What was the duration of the inter views or focus group? Each focus group consisted of three to six participants and lasted approximately two hours (+/- 35 minutes). The semi-structured interview lasted between 60 and 90 minutes. | Results-Page 5                       |
| 22. Data saturation                    | Was data saturation discussed?                                                                                                                                                                                                        | Methods-Page 4                       |
| 23. Transcripts returned               | Were transcripts returned to participants for comment and/or correction? No                                                                                                                                                           | -                                    |
| <b>Domain 3: analysis and findings</b> |                                                                                                                                                                                                                                       |                                      |
| <i>Data analysis</i>                   |                                                                                                                                                                                                                                       |                                      |
| 24. Number of data coders              | How many data coders coded the data? 12 coders                                                                                                                                                                                        | Methods-Page 5                       |
| 25. Description of the coding tree     | Did authors provide a description of the coding tree? No                                                                                                                                                                              | -                                    |
| 26. Derivation of themes               | Were themes identified in advance or derived from the data? Derived from the data                                                                                                                                                     | Methods-Page 5                       |
| 27. Software                           | What software, if applicable, was used to manage the data?                                                                                                                                                                            | NVivo 11 Pro                         |
| 28. Participant checking               | Did participants provide feedback on the findings? Yes                                                                                                                                                                                | Strengths and limitations            |
| <i>Reporting</i>                       |                                                                                                                                                                                                                                       |                                      |
| 29. Quotations presented               | Were participant quotations presented to illustrate the themes/findings? Was each quotation identified? e.g. participant number Yes                                                                                                   | Results                              |
| 30. Data and findings consistent       | Was there consistency between the data presented and the findings? Yes, mainly                                                                                                                                                        | Discussion                           |
| 31. Clarity of major themes            | Were major themes clearly presented in the findings? Yes                                                                                                                                                                              | Results                              |
| 32. Clarity of minor themes            | Is there a description of diverse cases or discussion of minor themes? Yes                                                                                                                                                            | Discussion                           |

# BMJ Open

## Understanding men's psychological reactions and experience following a cardiac event: A qualitative study from the MindTheHeart Project

|                                 |                                                                                                                                                                                                                                                                                                                                                                                                                                                                                                                                                                                                                                                                                                                                                                                           |
|---------------------------------|-------------------------------------------------------------------------------------------------------------------------------------------------------------------------------------------------------------------------------------------------------------------------------------------------------------------------------------------------------------------------------------------------------------------------------------------------------------------------------------------------------------------------------------------------------------------------------------------------------------------------------------------------------------------------------------------------------------------------------------------------------------------------------------------|
| Journal:                        | <i>BMJ Open</i>                                                                                                                                                                                                                                                                                                                                                                                                                                                                                                                                                                                                                                                                                                                                                                           |
| Manuscript ID                   | bmjopen-2019-029560.R1                                                                                                                                                                                                                                                                                                                                                                                                                                                                                                                                                                                                                                                                                                                                                                    |
| Article Type:                   | Original research                                                                                                                                                                                                                                                                                                                                                                                                                                                                                                                                                                                                                                                                                                                                                                         |
| Date Submitted by the Author:   | 21-Aug-2019                                                                                                                                                                                                                                                                                                                                                                                                                                                                                                                                                                                                                                                                                                                                                                               |
| Complete List of Authors:       | Jbilou, Jalila; Universite de Moncton, Psychology; Universite de Moncton, Centre de formation médicale du Nouveau Brunswick<br>Grenier, Jean; Hopital Montfort, Institut du Savoir Montfort<br>Chomienne, Marie-Helene; University of Ottawa, Family Medicine;<br>University of Ottawa, School of Epidemiology and Public Health<br>Talbot, France; Universite de Moncton, Psychology<br>Tulloch, Heather; University of Ottawa, University of Ottawa Heart Institute, Cardiac Prevention and Rehabilitation<br>D'Antono, Bianca; Universite de Montreal, Psychology Department and Research Centre at the Montreal Heart Institute<br>Greenman, Paul; Universite du Quebec en Outaouais, Département de Psychoéducation et de Psychologie; Hopital Montfort, Institut du Savoir Montfort |
| <b>Primary Subject Heading</b>: | Mental health                                                                                                                                                                                                                                                                                                                                                                                                                                                                                                                                                                                                                                                                                                                                                                             |
| Secondary Subject Heading:      | Qualitative research                                                                                                                                                                                                                                                                                                                                                                                                                                                                                                                                                                                                                                                                                                                                                                      |
| Keywords:                       | Depression & mood disorders < PSYCHIATRY, QUALITATIVE RESEARCH, REHABILITATION MEDICINE, Coronary heart disease < CARDIOLOGY, Ischaemic heart disease < CARDIOLOGY, Myocardial infarction < CARDIOLOGY                                                                                                                                                                                                                                                                                                                                                                                                                                                                                                                                                                                    |
|                                 |                                                                                                                                                                                                                                                                                                                                                                                                                                                                                                                                                                                                                                                                                                                                                                                           |

SCHOLARONE™  
Manuscripts

## Understanding men's psychological reactions and experience following a cardiac event: A qualitative study from the MindTheHeart Project

---

**Authors:** Jalila Jbilou PhD, MD; Jean Grenier PhD, CPsych; Marie-Hélène Chomienne MSc, MD; France Talbot PhD, LPsych; Heather Tulloch PhD, CPsych; Bianca D'Antono PhD; Paul S. Greenman PhD, CPsych on behalf of the MindTheHeart Project Team

- **Corresponding author:** Jalila Jbilou, 18 Ave Antonine Maillet, Moncton E1A3E9 New Brunswick, Canada. [jalila.jbilou@umoncton.ca](mailto:jalila.jbilou@umoncton.ca) Tel: 1-506-858-4931
- **Co-authors:**
  - Jean Grenier, Institut du Savoir Montfort, Hôpital Montfort, Ottawa, Canada
  - Marie-Hélène Chomienne, Department of Family Medicine, and School of Epidemiology and Public Health, University of Ottawa, Ottawa, Canada
  - France Talbot, School of psychology, Université de Moncton, Moncton, Canada
  - Heather Tulloch, University of Ottawa Heart Institute, Cardiac Prevention and Rehabilitation, Ottawa, Canada
  - Bianca D'Antono, Psychology Department, Université de Montréal, and Research Centre, Montreal Heart Institute, Montreal, Canada
  - Paul S. Greenman, Département de psychoéducation et de psychologie, Université du Québec en Outaouais, Gatineau, Canada and Institut du Savoir Montfort, Hôpital Montfort, Ottawa, Canada.
- Word count (6356 words), excluding title page, abstract, references, figures and tables.

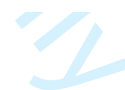

## Abstract:

**Objectives:** Emotional issues such as depression, anxiety, and post-traumatic stress disorder are common following a cardiac event. Despite their high prevalence, they often go undiagnosed and research suggests that men in particular are at higher risk. Therefore a better understanding of men's experiences with a cardiac event and ensuing health services is key for adapting approaches that meet their needs. The aim of this study was to describe the self-reported emotional challenges that men face following a cardiac event and to understand their patterns of psychosocial adjustment.

**Design** Qualitative study (focus groups and semi-structured interviews) using an interpretive phenomenological analysis.

**Setting** Clinical settings (Cardiac departments in hospitals, Cardiac rehabilitation programs and family medicine clinics) and in the community in three Canadian provinces. **Participants** A total of 93 men participated in the study through 22 focus groups and 5 semi-structured interviews. **Results** Four major themes emerged: 1) Managing uncertainty and adversity; 2) Distancing, normalizing, and accepting; 3) Conformity to traditional masculine norms; and 4) Social, literacy and communication challenges.

**Conclusions** Health professionals caring for men following a cardiac event must be aware of the psychological and social adjustments that accompany the physical challenges. However, there is a lack of explicit guidelines, tools and clinical training in men-sensitive approaches. Further research is required to better inform clinical practices and healthcare services.

## Strengths and limitations of this study

This is the first large qualitative study in Canada that provides an in-depth understanding of psychological reactions and experiences in men following a cardiac event.

This study provides comprehensive insight into major dimensions that need to be considered in future intervention research that aims to improve men-sensitive psychocardiology services.

The qualitative data analysis process included a three-round approach to ensure inter-coder reliability and to control for subjectivity.

This study did not include men from cultural minorities or Indigenous populations; hence, the findings may not have captured the needs and lived experiences of these populations.

We did not systematically recruit or conduct analyses by age, cardiac diagnosis or comorbidities and different themes may have emerged across these factors. Also we did not take into account when the event had occurred in relation to the data collection, hence this may have introduced different perceptions if the event was recent vs more than a few years past.

1  
2  
3  
4  
5  
6  
7  
8  
9  
10  
11  
12  
13  
14  
15  
16  
17  
18  
19  
20  
21  
22  
23  
24  
25  
26  
27  
28  
29  
30  
31  
32  
33  
34  
35  
36  
37  
38  
39  
40  
41  
42  
43  
44  
45  
46  
47  
48  
49  
50  
51  
52  
53  
54  
55  
56  
57  
58  
59  
60

For peer review only

## 1. Introduction

Emotional issues such as depression, anxiety, and post-traumatic stress disorder (PTSD) are common among patients who experience a major cardiac event (i.e. acute coronary syndrome (ACS)) [1]. Despite high prevalences, these symptoms and psychological disorders often go undiagnosed and contribute to an increased risk of related morbidity and mortality, as well as social and economic vulnerability [2]. Psychocardiology, or clinical psychology in cardiac settings, is the science and practice of applying psychological knowledge to the prevention, treatment, and rehabilitation of patients with cardiac disease [3]. From this perspective, psychological and cardiac issues are interdependently addressed by collaborative interprofessional teams through patient-centred approaches.

Stepped-care models include a continuum of mental health interventions and services required to provide adequate health services and support in the most cost-efficient manner, based on patients' needs and choices. These models have shown effectiveness with different health conditions, including cardiac disease [4–7]. However, the last two decades of research in psychocardiology show that less than 25% of men with ACS engage in secondary prevention delivered by cardiac rehabilitation centres, seek support, or use appropriate timely interventions for their psychological distress and mental health [8–10]. Implementing effective psychocardiology stepped-care services for this population would require taking into account the social and behavioural determinants of men's health. To our knowledge, no research has been conducted on the acceptability and feasibility of a stepped-care model approach to psychological treatment that has been specifically designed to be sensitive to the needs and expectations of men with cardiac disease.

The MindTheHeart program, an innovative psychocardiology initiative launched in three Canadian provinces, aims to improve the prevention, early detection, and treatment of depression, anxiety, and PTSD in men following a cardiac event. The cornerstone of this program was to design and test the feasibility and acceptability of a stepped-care approach to treatment structured into: Step 1: Psychoeducational intervention, Step 2: Group therapy including sessions with a significant other, and Step 3: Individual or couple therapy based on patient preference.

To appropriately design and tailor this stepped-care model to the needs of men following a cardiac event, it was essential to gain a better understanding of their experience with cardiac disease and existing health services (or lack thereof). For the purpose of this article, our aims are to describe the self-reported emotional challenges that men face following a cardiac event and to understand their patterns of psychosocial adjustment.



## 2. Methods

### 2.1. Study design

A qualitative study was conducted using an inductive phenomenological qualitative approach to provide a detailed description of the experience of men with cardiac disease while staying true to the collected qualitative data [11,12]. The consolidated criteria for reporting qualitative research (COREQ) were used to structure this study and ensure its methodological quality [13].

### 2.2. Participants

Convenience samples were recruited through cardiac rehabilitation programs and cardiac departments or clinics at teaching hospitals as well as in the community in three Canadian provinces: New Brunswick, Ontario and Quebec. To recruit participants we used a combination of both active (patient solicitation at participating cardiac rehabilitation programs and a snowball technique) and passive (radio broadcasts and advertisements in local newspapers) strategies. The inclusion criteria were: 1) to be 19 and over in New Brunswick, and 18 and over in Ontario and Quebec; 2) to have had a myocardial infarction, unstable angina, or heart surgery in the last 5 years with or without depression, anxiety or PTSD; 3) to be able to read and speak English or French; 4) to be able to provide informed consent; and 5) willing to participate in a group discussion. A sampling frame was developed to capture variation in age, marital status, cardiac health, mental health conditions, spoken language (French or English), and socioeconomic status.

### 2.3. Data collection

Data collection took place between May 2016 and August 2017. The focus group qualitative technique was selected to gather information [12]. This technique is appropriate for exploring patients' experience and perspective through a collective discussion. Interactions and discussions between participants are encouraged. Experiences and opinions are shared and explored while participants are questioning or challenging one another or disagreeing with one another. Initially, only focus groups were planned, but due to challenges in recruiting a sufficient number of participants (time constraints, limited availability due to summer vacations, reticence to partake in a group discussion), we also carried out a total of five (n=5) one-on-one semi-structured interviews to ensure inclusiveness. Focus group discussions were facilitated by two members of the research team using a discussion guide (See Appendix 1). A preliminary version of the guide was reviewed by four male patients (two French and two English) to assess its intelligibility and appropriateness. Psychology and medical research staff, including the authors, conducted the focus groups and semi-structured interviews.. The same interview guide was used for the semi-structured interviews, which were conducted either face-to-face or by telephone. Participants were aware of the study's aims and objectives. They had the opportunity to ask questions to the interviewers prior to giving written informed consent to participate. Focus groups and semi-structured interviews were conducted in English or French based on participants' preference and took place at either a hospital or university setting. Data collection continued until information and conceptual saturation was reached.

## 2.4. Data analysis

The audio-taped focus groups and semi-structured interviews from the three provinces were transcribed verbatim and anonymized. When available, the field notes taken by interviewees were included in the analysis. An interpretative phenomenological analysis (IPA) was used to guide the thematic analysis of the data [14,15]. IPA is an inductive qualitative content analysis that allows for the description of patterns without *a priori* theories or models to guide the analysis. The aim of IPA is to explore in depth the participants' personal experiences, their meaning for them, how they make sense of these experiences, and what they would recommend to better meet their needs. The analytic approach followed iterations of thematic content analysis and codes were created through open and axial coding to capture emergent themes [16].

To effectively manage the amount of collected data, we organized a collaborative analytic team. The first author was responsible for the data analysis management process including the development of the MindTheHeart manual for the qualitative study, the delivery of data analysis training sessions and the development of a codebook. She acted as a referee when needed. To ensure consistency in data analysis, 10% of the transcribed verbatims were randomly selected and four analysts independently coded 10% of the material. This strategy allowed the calculation of the inter-coder reliability [17]. The inter-coder reliability check consisted of coding and comparing the findings of each of the coders (2X2). The Cohen coefficient was used to assess to what extent the data deviated from perfect reliability. A coefficient of 80% or more was considered appropriate. Once this was reached, we considered that all analysts were using the same interpretative approach and data were analysed in a complementary manner. We performed three rounds of inter-coder reliability tests and two rounds of data analysis training sessions to create a convergent analytic approach. The transcribed material was analyzed through a systematized analytic process under the shared server of NVivo11-Pro (QSR International, Doncaster, Victoria, Australia).

**Patient and Public Involvement:** Patients were not involved in the design of this study. Results were presented through public talks.

## 3. Results

A total of 22 focus groups (88 men) and 5 semistructured interviews (5 men) were carried out. In total, 93 men participated across the three provinces. Each focus group consisted of three to six participants and lasted approximately 85 to 155 minutes (Mean= 147 minutes). The semi-structured interviews with single participants lasted between 60 and 90 minutes (Mean= 82 minutes). The sociodemographic characteristics of the participants are presented in Table 1. In terms of mental health status, we asked the following question: "Are you suffering from a mental health issue?". In the New Brunswick sample, three men reported suffering from depression, two reported suffering from depression and anxiety, and one reported PTSD. In the Ontario sample, four men reported having anxiety, three reported depression and one indicated having anxiety and depression. In the Quebec sample, two declared anxiety and one noted depression. Being self-reported,

1  
2  
3 this information presents with obvious limitations (i.e. lack of precision in regards to  
4 diagnosis and severity, based on patient interpretation, missing data). In terms of heart  
5 disease, we asked the following question: "Are you suffering from, have you ever suffered  
6 from, or are you at risk of heart disease?". All participating men declared currently  
7 suffering from at least one cardiac health condition, and having experienced at least one  
8 cardiac event. In the New Brunswick sample, 24 had experienced an ACS and nine had  
9 undergone open heart surgery (eight had Coronary artery bypass grafting (CABG) and one  
10 had a valve replacement). In Quebec, six men declared an ACS and two had undergone  
11 open heart surgery. Of the Ontario sample, three declared having undergone heart  
12 surgery and 23 experienced an ACS. This information is again based on self-report, and  
13 thus presents with limitations (as previously noted).  
14  
15  
16  
17  
18  
19  
20  
21  
22  
23  
24  
25  
26  
27  
28  
29  
30  
31  
32  
33  
34  
35  
36  
37  
38  
39  
40  
41  
42  
43  
44  
45  
46  
47  
48  
49  
50  
51  
52  
53  
54  
55  
56  
57  
58  
59  
60

|                                                 | Age range (years)                   | Ethnicity                                                             | Education                                                  | Marital status                                                                                  | Employment status                                                                        | Language     |
|-------------------------------------------------|-------------------------------------|-----------------------------------------------------------------------|------------------------------------------------------------|-------------------------------------------------------------------------------------------------|------------------------------------------------------------------------------------------|--------------|
| <b>New Brunswick</b>                            |                                     |                                                                       |                                                            |                                                                                                 |                                                                                          |              |
| Focus groups – (8 groups for a total of 37 men) | 45 to 79                            | Caucasian: 37                                                         | Secondary: 17<br>College: 4<br>University: 16              | Single: 3<br>Married: 25<br>Common law: 4<br>Divorced: 2<br>Widowed: 2<br>Widowed + Divorced: 1 | Employed: 13<br>Retired: 18<br>Employed + retired: 1<br>Semi-Retired: 3<br>Sick leave: 2 | 6 EN<br>2 FR |
| Semi-structured interviews (4 men)              | 45 to 54                            | Caucasian: 4                                                          | Secondary: 1<br>College: 3                                 | Single: 2<br>Married: 2                                                                         | Employed: 3<br>Sick leave: 1                                                             | 3 EN<br>1 FR |
| <b>Ontario</b>                                  |                                     |                                                                       |                                                            |                                                                                                 |                                                                                          |              |
| Focus groups - (9 groups for a total of 36 men) | 51 to 90                            | Caucasian: 34<br>Caucasian + Jewish: 1<br>Caucasian + First nation: 1 | Primary: 3<br>Secondary: 2<br>College: 7<br>University: 24 | Single: 1<br>Married: 19<br>Common law: 7<br>Separated: 2<br>Divorced: 7                        | Retired: 28<br>Sick leave: 3<br>Employed + retired: 5                                    | 4 EN<br>5 FR |
| <b>Quebec</b>                                   |                                     |                                                                       |                                                            |                                                                                                 |                                                                                          |              |
| Focus groups - (5 groups for a total of 15 men) | 45 to 75                            | Caucasian: 15                                                         | Primary: 2<br>Secondary: 4<br>College: 4<br>University: 5  | Single: 2<br>Married: 9<br>Common law: 4                                                        | Employed: 1<br>Retired: 12<br>Sick leave: 1<br>Unemployed: 1                             | 1 EN<br>4 FR |
| Semi-structured interview (1 man)               | Not included to protect for privacy |                                                                       |                                                            |                                                                                                 |                                                                                          |              |

**Table 1 Sociodemographic characteristics of participants**

EN: English; FR: French

1  
2  
3 Interpretive phenomenological analysis of the gathered qualitative data from the three  
4 provinces highlighted emotional issues, as well as patterns of psychosocial adjustment  
5 challenges, faced by men following a cardiac event. Emerging themes were categorized  
6 and are presented below. Quotes have been reproduced to illustrate key points. To  
7 preserve anonymity and confidentiality quotes were tagged using a pseudonym (male  
8 name). French quotes were translated into English for the purpose of this publication.  
9  
10

### 11 **3.1. Managing uncertainty and adversity**

12 A temporal sequence emerged across data as being instrumental in affecting men's  
13 experience following a cardiac event.  
14

#### 15 **"Not me, not now!" Denial reaction and delay in seeking help**

16  
17 Refusing to recognize the cardiac event and purposely delaying the hospital (emergency  
18 department) visit seems to be a prevailing behaviour among men. *"I was working, my  
19 back got very sore, and I broke out in a cold sweat, but I finished my shift. I knew ... it was  
20 my heart. So, I went home, showered, ate a little bit and had my last cigarette, cause I'm  
21 a smoker."* - **Gérard**. *"I rolled over in bed a couple of times when I should've gone to the  
22 hospital. Cause I know my wife would freak out, she'd be worried about me, right? And I  
23 know I'd be in the hospital for 12 hours, which would mean I couldn't go to work the next  
24 day. So I'm just going to roll over and just, you know, roll the dice on this, on this event,  
25 today, and see how it goes."* - **Tim**. *"I was home with chest pains. Not pain, but just  
26 pressure in my chest. Never for a minute, for a second, did I clue in that I had a heart  
27 problem on Thursday. I went back to work on Friday. Same pain, but when I sat down and  
28 rested, it went away. On Saturday I was home. I started my power saw to cut branches on  
29 trees and cut down a tree, and clean up the yard. And I only went to the doctor on Tuesday  
30 of the following week. Expecting to go there and he would say "Take a few tests and you'll  
31 go back home and we'll call you in a few weeks". Well, it changed when he said 'You're not  
32 going anywhere. You're going to be here a few days'. And I realised I was stupid. I  
33 should've gone on Thursday."* - **Gary**  
34  
35  
36  
37  
38  
39

40 Across discussions, two contrasting explanations for the denial reaction and delay in  
41 seeking help emerged: 1) the sense of invincibility perceived by younger men (30 to 50  
42 years old), as they did not see themselves at risk and could not understand or accept why  
43 they suffered a cardiac event: *"younger men are brought up to feel that they are a bit  
44 invincible, that you know, they're bullet proof and you know that doesn't happen to  
45 them"* - **Paul**, as well as by older men who had previously recovered from severe illnesses  
46 such as a heart attack or a cancer and perceived themselves as warriors, *"I survived a  
47 cancer before, I haven't much of a fear of dying"* - **Pat** and 2) the sense of vulnerability  
48 expressed by men who described the cardiac event as a loss (of control, of power, of  
49 dignity, and of autonomy) or a fear (of receiving a life-threatening diagnosis, of  
50 permanent incapacity or disability, of early retirement, or of death). An additional  
51 explanation mentioned across groups was the competing priorities of daily living and  
52 putting others above self *"it's hard to take time for yourself when you have a lot of  
53 obligations"* - **Marc**. Stressing about the lack of time and being busy is used to positively  
54  
55  
56  
57  
58  
59  
60

1  
2  
3 explain and justify the treatment-seeking delay behaviour. This type of avoidance  
4 behaviour in regards to seeking help was often perceived as being somewhat of a  
5 responsible and altruistic behaviour, thus making it more acceptable and meaningful and  
6 reinforcing the masculine gender role and its impact on engaging in help-seeking and  
7 treatment-seeking.  
8  
9

### 10 “What am I doing here? What’d be my life once I’m back home?”: The in-hospital 11 journey 12 13

14 The hospital stay, whose length varied according to the severity of the cardiac event, was  
15 most often described as very difficult, involving sleepless nights, worries, fear of death,  
16 and sometimes anger. Having to “stay in bed” was depicted as a failure, a loss of power  
17 and confidence, or an unfair situation. *“It changed my life totally. Like, you know, I was  
18 pretty confident, pretty, you know, I was a supervisor at my work, captain of my team,  
19 just, you know, that 10 feet tall and bulletproof. I wasn’t there anymore, right?”- Jacques*  
20 While reactions varied, one particular question transcended across groups: *“what would  
21 be my life once at home?”*. The anxiety generated by this question was discussed in groups  
22 as an important concern.  
23  
24  
25

26 Across groups, men typically shared that they were very satisfied with the care they  
27 received (i.e., procedures, medications, interactions with health professionals about their  
28 cardiac condition) during their hospital stay, but that one thing they tended to avoid  
29 discussing openly was their apprehension about life after hospitalization. Thus,  
30 uncertainty about life after hospitalization emerged as a dominant theme across groups  
31 when discussing in-hospital challenges. In-hospital uncertainty was further characterized  
32 by lack of, or inability to achieve, a clear understanding about the cardiac event, its impact  
33 on the body and daily functioning, eventual impact on one’s job or employability, and  
34 risks in terms of survival (fear of death). The main reasons why men experienced anxiety  
35 in the form of uncertainty about the future were that they (a) did not understand, or  
36 accept, the cardiac event; (b) did not feel in control of their future (how things are going  
37 to evolve?); (c) were intimidated by unintelligible medical terminology and high-tech  
38 procedures; and (d) apprehended the adjustments and the changes to be implemented  
39 once at home. Uncertainty about the future was associated with lack of self-confidence  
40 and was exacerbated by poor health communication on the part of professionals and in  
41 some cases the patients themselves, who were often reticent to share their concerns or  
42 to ask questions. Communication behaviours on the part of health care providers such as  
43 speaking in general terms and referring to population statistics (as opposed to using more  
44 precise and personalized information), only communicating via short conversations in a  
45 shared room while patients are in bed (as opposed to creating opportunities for asking  
46 questions in a more confidential environment), or providing unclear explanations using  
47 medical jargon (as opposed to clear explanations in lay terms), appear to play a critical  
48 role in generating and exacerbating feelings of uncertainty and apprehension about the  
49 future.  
50  
51  
52  
53  
54  
55  
56  
57  
58  
59  
60



### “I’m not the man I used to be!”: Post-hospital discharge

Returning home following a cardiac event was discussed as an important transitioning phase. Group discussions revealed that being told to “*slow down and stay home,*” even for a short period, was often experienced as unacceptable and devaluing. Post-hospital discharge, especially in the early going, was associated with psychological distress, frustration, and discomfort related to adopting the recommended lifestyle changes (e.g., lower sodium intake, eating more fruits and vegetables, quitting smoking), resting at home, and daily medication intake. Lack of understanding of medical advice and recommendations, lack of preparedness for the changes to be implemented, and the experience of having had a “*brush with death*” were mentioned as major stressors.

*“You know, the thing that stuck in my mind the most, of this whole episode... I talked to the surgeon before the operation, and he went through all the steps of what’s happening, and bottom line, there’s a 2% chance that you’re gonna die... That gets your attention”- Henry. “Like, this gentleman keeps saying “If it’s your time to go, it’s your time to go.” But for me, I’m not saying that I’m more or less important, but I have a young kid, so when your doctor tells you that you better make sure that your will is fully done and your financial situation is good cause you’re a ticking time bomb, at 40, I have a young kid and for me, it plays a lot in my head, right”-George. “What I found the hardest of all is before my operation and after, they told me what I could do, what I couldn’t” -Virgile*

Perceived control was identified as a dynamic cognitive process that fluctuated in response to the cardiac event. Men constantly attempted to retain or gain control during the rehabilitation phase and even beyond this period. Changes in environmental circumstances, such as being hospitalized for extended periods of time, re-hospitalization for complications and then being discharged home, impinged directly on their ability to feel in control of their daily lives. The process of gaining a better sense of control was facilitated by rationalizing, or making sense of a new phase in their treatment or illness prognosis or by gaining awareness of environmental challenges “*once you accept that you are restricted in your physical abilities it gets easier*”- Paul.

The post-hospital discharge and recovery process experience are mainly shaped by age, social connectedness (life partner, family, friends, and community involvement), psychological preparedness, personality, and economic status (finances, employment, etc.). Groups’ narratives revealed that feelings of powerlessness and sleep disturbances were experienced at all stages of the rehabilitation process and were often associated with the fear of dying. “*I was afraid for a long time to go to sleep. I would stay up for like three days until somebody slept with me more or less, right? My girlfriend at the time, we didn’t stay together every night, but if she wasn’t with me, I wouldn’t sleep. I was afraid to go to sleep and not wake up.*”-Albert.

### 3.2. Distancing, normalizing, and accepting

Men reported that stepping back and reflecting on their own emotional reactions and experiences helped them make sense of their changing lives post-cardiac event. Two

1  
2  
3 perspectives emerged : experiencing it as a personal failure and/or as an opportunity (a  
4 second chance for a better life). In both perspectives, they were ready to accept this new  
5 normality and were ready for adjustment. *“Once you accept that you are restricted in your  
6 physical abilities it gets easier”-Bernard.* They reported using various strategies  
7 (spirituality, religion, faith, praying, introspection, meditation) as means to help them  
8 make sense of their cardiac event and accept the situation *“Well, I wouldn’t say I was  
9 completely free of worry for myself. Like the day before surgery, I went up to Sainte-Anne-  
10 De-Beaupré and I went to confession. So I was, you know. I wasn’t completely fearless,  
11 going in”-Paul.* *“Well you know there’s a lot of factors that impact on getting better  
12 support, prayer... I think prayer is a big thing, faith is a big thing too, you need to go for  
13 help”-Jack.* *“Spirituality helps, it gives you strenghts and courage. I think it’s a  
14 psychological thing”-Marc.*

15  
16  
17  
18  
19 Increased awareness of one’s mortality was described as a motivating factor to help them  
20 prioritize taking charge of their health. Redefining priorities with their life partner and  
21 family, or engaging in companionship was also described as helpful: *“My wife as well was  
22 very helpful, which means, she was not entirely too sympathetic which is, this is what you  
23 need to do, you know (laughs).”-Patrick* *“Like she took care of all my meds. Prior to the  
24 surgery, she wouldn’t even know what meds I was on. But after that, she was the one who  
25 knew what med, and when there were changes”- Albert.*

26  
27  
28 After being stabilized medically, reactions varied among men. Groups discussed three  
29 main reactions: (a) processing and reflecting on the lived experience and engaging in  
30 adopting a healthy lifestyle as a personal or family challenge, (b) taking the necessary time  
31 to process the traumatic event (to absorb the shock and understand what was happening)  
32 and then gradually exploring options and implementing changes, and (c) resisting and  
33 ignoring recommendations, using self-reliance and continuing the same lifestyle as before  
34 the cardiac event. *“I disregarded anything that my doctors were telling me, and I said that  
35 I had to take control of my own situation.”-Charles*

### 39 3.3. Conformity to traditional masculine norms

40 Dominant masculine norms can affect perceptions, acceptance, and normalization of the  
41 psychological distress following a cardiac event as well as help-seeking behaviours and  
42 mental health services utilization. *“Broken masculinity”* emerged as a transversal theme  
43 illustrating how deeply “masculinity and virility” were affected following a cardiac event.  
44 The functional limitations (i.e. staying at home, not driving, not shovelling snow, not lifting  
45 heavy weights), prescribed by their doctor or that were consequences of their heart  
46 condition and related medication (i.e. erectile dysfunction), were experienced as a major  
47 loss of manhood *“Well, weakness also. There’s a role. You’re the father, and there’s a role.  
48 And there’s responsibilities that go with that role. And you want to continue to do your  
49 job, as a father. And you don’t want to show them that you’re as vulnerable as you are at  
50 the moment. You kind of try to carry through. Which is tiring, cause then when they’re  
51 gone, you’re just wiped out. You just put everything. You put the whole day’s energy into  
52 that session with them.” – Jean-Pierre.* Perceiving their social role as “family  
53 breadwinner” or “family strong pillar” prevented men from sharing their emotions and  
54  
55  
56  
57



worries to their children or relatives. The altruistic behaviours, such as protecting relatives from worries, are valued by men and are used as intrinsic strategies to regain self-confidence and sense of manhood. *“Well, I have a 14 year old son, who looks up to me I’m sure. I’m his father. So, you know, sometimes when I’d see him, surely, I’d say after the surgery when you’re really not feeling yourself... You have to put on a game face because you really don’t want to show exactly how you feel to your children, cause they’re going to worry.” - Brian.*

The tendency to view and label certain behaviours as *“feminine”* as opposed to *“masculine”* seems to be an aggravating factor in terms of delaying or avoiding seeking help and using mental health services *“...women will tend much more to talk about it to their friends in regards to how they’re feeling. Where a man, sometimes it’s hard to share with your partner sometimes. You don’t want to show that sign of weakness, and that’s the way that I look at it.” - Bill* *“Suddenly you go through a heart attack and you will be like that (clic) the man they expect you to be, I mean the open minded... the touchy feel... you know... talking about private things... with people you don’t know, Oh wow! Not me...”-Greg* *“I find that women will talk to each other about emotions and how they feel. But how often do you go to work and sit down with one of your friends and start talking about your emotional problems? Not often. It’s just something that men don’t do”-Alban*

Men working in male-dominated workplaces (i.e., paramedics, police, military, construction, fishery industry) stressed the importance of educating people in their workplaces and of providing them with supportive tools and strategies. *“The other thing too is like, in the military, I was trained for 32 years to be macho. There’s no such thing as being depressed or tired or... you know what I mean? You’d just go out and do your thing, that’s just the way it was. And that training, today, is still instilled in me.”- Martin.*

#### 3.4. Social, literacy, and communication challenges

Following a cardiac event, men felt they had to change certain patterns within their lives and adjust to changes in their role as life partners, parents, and employees. There was a perception of loss of confidence in their physical capabilities and functioning in family and work relationships. Low social connectedness and support before the cardiac event was discussed in groups as a risk factor for cardiac disease and mental illness and as associated with poor mental functioning and quality of life during the recovery period. The quality and the intensity of family relationships as well as those with friends and co-workers varied over the course of recovery post-cardiac event and were dependant on men’s acceptance of the situation and their need for help. When discussing social support and its relevance for a healthy recovery, the necessary balance between expected and received support emerged as key. Indeed, while they found it sometimes difficult to share their thoughts and challenges with their relatives, men appreciated the attention, the compassion, the understanding, and the support of their life partner, family members, and friends. Supportive interpersonal relationships were viewed as helpful for breaking the cycle of distress and anxiety. The support received improved men’s trust in their ability to deal with the cardiac event, the cardiac rehabilitation, and the necessary

1  
2  
3 adjustments. However, men mentioned sometimes being irritated because of the  
4 overprotectiveness of some relatives. In particular, being under ‘*spouse’s management*’,  
5 they felt that they had lost part of their personal space, their independence and  
6 manhood. “...*All of a sudden, people feel, my wife in particular, well, here’s somebody*  
7 *who’s not an invalid, but we have to, you know, every time you do anything it’s well, you*  
8 *shouldn’t be doing this, you shouldn’t be doing that, you shouldn’t be... And that sort of*  
9 *affected me – it still does – more than any other things...*” – **Mark**.

12 Sexual problems developed in the aftermath of the cardiac event, either functional ones  
13 related to their ability to sustain an erection or to ejaculate (often side-effects of  
14 medications), or psychological ones that involved fears of exacerbating their heart  
15 condition if they were to engage in sexual activity, were described as a major concern.  
16 “*Sexually, I’m not the man I used to be. It’s just – and I blame it on the pills – it’s just that*  
17 *my life has changed drastically...I keep toying with the idea that maybe I should stop*  
18 *taking the pills, but I know that it’s gonna get me one way or the other... So... it’s really*  
19 *finding a sweet spot with the right medication.*”-**Wayne** “*you don’t have anymore the*  
20 *sexual drive, you know, that you had before*”-**Martin**

### 24 **Concerns about work**

26 As work is a significant aspect of personal and social identity, being on a long term sick  
27 leave may lead to feelings of shame and guilt or regarding oneself as incompetent,  
28 incapable, or physically weak. “*I’ve been out of work for a year and a half. I don’t want to*  
29 *go back there. I don’t want the stress of it. In the meantime, my work’s moving, so we’re*  
30 *all going to lose our jobs anyways. I’ve been there 22 years. So it’s just another stressor,*  
31 *right? And a lot of stuff outside of work, and it’s a helpless feeling.*”-**Paul**. “*I supervised*  
32 *the Giant Tiger warehouse. I couldn’t do that anymore. You know what I mean? Stuff like*  
33 *that, you know? The only thing I do anymore is play baseball. That’s just it...*”-**Richard**.  
34 Early returning to work, even against medical advice, is discussed as a problem-solving  
35 strategy to reinforce self-confidence and overcome stress. “*The cardiologist came, he*  
36 *says, “well, we have to do a triple bypass”. I looked at him, I said, “well, how long am*  
37 *gonna have to stay in the hospital?”. He said, “two weeks”. I says, “I don’t have time for*  
38 *that. I have to be back at work for the 29th*”-**Serge** “*after my heart attack, the only thing*  
39 *I wanted to do was get better so I could go back to work, ‘cause I’m only 52 and I need to*  
40 *work. So, that’s all about*”-**Georges**

### 45 **Health literacy, health communication and health services navigation**

46 Men’s health literacy was pointed out as a major challenge. The lack of understanding  
47 medical jargon and procedures emerged as an additional stressor and was described as a  
48 barrier for asking questions and seeking more information, explanations, or advice. The  
49 bidirectional association between cardiac health and mental health was unclear and not  
50 fully understood. Moreover, mental illness signs, symptoms, and diagnostic labels seem  
51 to interfere with the masculine ideals. Indeed, men did not identify themselves as  
52 “depressed”, “stressed”, or “anxious” but used restrictive vocabulary to express  
53 emotional distress like “low energy”, “challenged”, or “meeting temporary difficulties”.

1  
2  
3 Men valued the quality and human kindness associated with healthcare providers they  
4 had access to and described how the interactions, the conversations, and the alliance they  
5 had with them enhanced their compliance with treatment plans and improved their  
6 general mental and physical health status. *"...They gave me all the paperwork, all the  
7 stress things, charts and stuff, and my GP was great. She would ask me how my mental  
8 state was. I don't know guys like that. I appreciate it, but my doctors know her when I go  
9 in her office. She's in no hurry. If I'm sitting there crying for 15 minutes, she's there for 20  
10 with me. So, yeah, I'm very lucky. I have great doctors..."*- **Serge**

11 Men put a strong emphasis on the quality of communication they had with health  
12 professionals, such as being listened to, not being rushed, receiving care with sympathetic  
13 attitude, being trusted and taken seriously *"I feel comfort. I feel comforted going to them.  
14 I really get a sense from my doctors that they really care about me."*-**William**.

15 However, the lack of time allocated by physicians to address emotional distress and  
16 social challenges following a cardiac event was reported as a barrier for access to  
17 supportive and caring services: *"You look at the doctor as being event-centered. In other  
18 words, he's there for a medical purpose. You have your 10 or your 15 minutes, and  
19 you're gone. You know, we're talking today about emotions, and this seems to be a time-  
20 consuming expensive exercise that at least the professionals I've dealt with haven't been  
21 available for. And you feel as though you're intruding on their importance, I guess, by,  
22 you know, having long chats and that sort of thing."*-**Patrick**. Men felt pressured by  
23 time: *"I just felt like I was just in and out like I was at a hair salon or something. You  
24 know, get this done, get the ECG done, and okay, see you later. Here's a prescription... I  
25 always felt like I was being rushed and brushed off. And so there was no relationship"*-  
26 **Mike**. *"You know, you've got your so many minutes. And I still think in our health system  
27 – and maybe not what's in the future – but if there was some minor pay for service, I  
28 think that would be helpful because you always feel you're on a sort of a diet of service.  
29 You're in; you're out, and of necessity. They move on to the next person."*-**Bruce**.

30 The lack of knowledge about the health system and how to navigate services and  
31 manage medical information appeared to lead to the perception of the healthcare  
32 system as a "men-unfriendly space" where they feel discomfort and uncertainty: *"I think  
33 there's a problem with men as a whole, and you know, women seem so much more in  
34 tune with, you know, going to see the doctor for themselves, child birth, kids, I mean,  
35 when my son was ill, I never went to the doctor with him, my wife took him and it just  
36 wasn't a place I'd go; didn't know him very well, didn't know much about what to tell  
37 him"*-**Philip**. Moreover, the perceived conflicting information received from different  
38 health professionals increased anxiety and stress about how to manage health  
39 conditions and how to use health services. Men participating in cardiac rehabilitation  
40 programs reported the benefits of social interaction with other cardiac patients,  
41 identified as the "cardiac family". Sharing a similar health condition helps to normalize  
42 the challenges and accepting the "new reality".

#### 4. Discussion

This study aimed to describe the emotional issues and understand the patterns of psychosocial adjustment experienced by men following a cardiac event. Across the three Canadian provinces, participants showed homogeneity in reported experiences of the cardiac event, and its subsequent psychological reaction and social impact. Adaptation to the event, both psychologically and socially, did not appear to relate to geographical location but rather to intra-individual experiences and differences (ie., cultural norms, beliefs, relationships, etc.)... In the focus groups men opened up readily about their emotions and their vulnerabilities. They shared their experiences and difficulties in adapting and adjusting to their “new post-cardiac identity” as well as the need to accept new roles. They acknowledged that this adjustment needed to be worked out with their environment, their home, their family, their friends, and their workplace. Most often they found support through their partners and through peer support when they attended cardiac rehabilitation sessions. The focus group sessions helped to validate and normalize their initial reactions. They regretted that the health professionals they had encountered had not enquired in a systematic way about their mental well-being as they would about their physical symptoms or diet or exercise. This is certainly an aspect of practice that would be pertinent for health professionals to change.

One important overarching element that was brought forth by men was the lack of systematic attention given by healthcare professionals to the psychological consequences of having experienced a cardiac event. It was suggested that some professionals may bring up the subject, but in most instances, the question was not asked. Therefore, there seems to be a lack of consistency within the health system in regards to the attention paid to the psychological sequelae of heart disease. These aspects were reported in previous studies on various health conditions [18–20]. However, there is still a lack of clear and evidence-based guidelines and resources to support men-sensitive health communication as well as clinical practices to foster men’s mental health. This study also revealed how traditional masculine norms can affect the way men experience and seek help for emotional distress following a cardiac event, and how these behaviours affect their health and wellbeing. Tailoring and targeting clinical interventions may increase men's service uptake and the efficacy of treatments. Specific factors associated with men's access to, and engagement with mental health care are critical to increasing help-seeking, treatment uptake, and effectual self-management among men experiencing emotional distress following a cardiac event.

While the literature contains extensive reports on “toxic masculinity” as a major determinant of men’s health [21] or its impact on help-seeking in men [22], our study revealed “broken masculinity” to be an untold and unrecognized distress following a cardiac event. We found that men experienced a great deal of psychological anguish over the changes imposed by their cardiac illness, and that these changes were directly related to their sense of themselves as men in their family and in society. Our results confirm, as suggested by previous research, that it will be crucial to address these

concerns in a systematic way in order to combat symptoms of depression, anxiety, and post-traumatic stress in men following a cardiac event [23,24].

Our results corroborate and extend what other researchers have found concerning the psychological impact of a cardiac event. The sense of uncertainty, stress, discouragement, and sometimes hopelessness that many men in our sample talked about as they struggled to come to terms with heart disease and its effects on their personal and professional lives is consistent with the elevated levels of depression, anxiety, and post-traumatic stress reported among men (and women) elsewhere in the literature [1,2]. This sense of “broken masculinity” might be dangerous because it reflects, among other things, an espousal of attitudes and values that emphasize self-sufficiency and strength to such a degree that men refrain from addressing concerns related to their physical and mental health. Indeed, the results of previous studies [8,10] have indicated that traditional attitudes of this nature are related to poorer health outcomes in men than in women.

The lack of readily accessible and understandable information on the mental health aspects of heart disease that we noted in this study, along with the emotional, professional, and interpersonal challenges that men discussed, suggest that healthcare providers need to be better informed not only of the psychological consequences of heart disease but also of gender-specific ways of coping with them. Although there are examples of some initiatives that move in this direction (e.g., the Canadian Rehabilitation Network of Ontario, the Atlantic Cardiac Rehabilitation Network), to our knowledge there is not yet a comprehensive strategy for addressing themes like “broken masculinity” in male cardiac patients. For this reason, it is imperative to develop and implement interventions that will take into account the psychological impact of heart disease on men’s sense of self, their relationships, and their work, along with the importance of adopting more flexible attitudes about what it means to be a man (i.e., a strong man asks for help when he needs it; a strong man takes care of himself and of others).

### Limitations

The participants in this study were mostly in their sixties and over, which is representative of the population of men with cardiac disease. However, it would be of interest to study more specifically cardiac disease in men in their 30s, 40s, or 50s as cardiac disease is becoming more prevalent in these men.

The participants in our study were essentially white, with little or no representation of other ethnic groups or indigenous people. This may not be representative of larger urban Canadian settings.

Although our inclusion criteria indicated a cardiac event in the last 5 years, for some participants, the first event may have occurred some 10 years prior and there may have been changes in cardiac rehabilitation programs and health services. Moreover, the



1  
2  
3 responsiveness of health professionals at the time may have been different. A  
4 quantitative study exploring these aspects may allow to retrieve accurate information.  
5  
6

### 7 8 **Strengths**

9 This study is the first of its kind to delve into the subjective experience of men with heart  
10 disease and to examine the link between their reactions to their cardiac event and their  
11 mental health. We were able to detect key themes that are likely to resonate with most  
12 men who have heart disease, which could serve as a foundation for the development of  
13 intervention programs, i.e. the stepped-care model.  
14  
15

### 16 17 **5. Conclusion**

18 This paper highlights the significant emotions that arise following a cardiac event and how  
19 men attempt to counter them as best as they can. It is known that men have a tendency  
20 not to talk about their emotions or to express them differently than women do. Health  
21 professionals caring for men in these contexts must be aware of this and receive training  
22 in gender-sensitive approaches. It will be important to systematically inform their  
23 patients of the possible occurrence of such emotions as well as the tools and resources  
24 to self-manage as a first step. Considering the impact on morbidity and mortality when  
25 anxiety, depression, or post-traumatic stress are in the diagnostic picture, cardiologists,  
26 cardiac surgeons and family physicians as well as psychologists and other health  
27 professionals involved in cardiac rehabilitation programs must be ready to systematically  
28 inquire and to screen their patients for common mental health conditions. Improved  
29 mental health of these patients will most likely improve their cardiac disease. A larger  
30 study is underway to longitudinally investigate the need for emotional support among  
31 men following a cardiac event as well as exploring acceptability and feasibility of men-  
32 sensitive stepped-care models.  
33  
34  
35  
36

37 **Ethical approval** The study received ethical approval from the research ethics boards  
38 (REB) of the participating study sites: Réseau de santé horizon : 2016-2295; Réseau de  
39 santé Vitalité : 2016-04-13; Université de Moncton : 1516-047; Hôpital Montfort : JJ-04-  
40 11-15; Institut de cardiologie de l'Université d'Ottawa : 2014-1801 (#projet), formulaire  
41 F11-4318; Université de Montréal : MP-33-2016-2006 (# projet), demande # F0-7529; and  
42 Hôpital de Hull : 2016-159 (# projet). All participants signed a confidentiality and consent  
43 form.  
44  
45

46 **Acknowledgements** The authors would like to thank the staff of the participating cardiac  
47 rehabilitation programs for their support with men recruitment, and the research staff  
48 (Arielle Doiron, Lise Gallant, Sarah Nowlan, Vanessa Tassé and Mireille Ntambwe) for their  
49 contribution in the transcription of verbatims, the data organization and the preliminary  
50 coding. The authors would also like to thank the men who have contributed to the focus  
51 groups and semi-structured interviews.  
52  
53  
54  
55  
56  
57  
58  
59  
60

1  
2  
3  
4 **Funding** This paper represents independent research, for which authors received funding  
5 from the Movember Foundation-Canada and from the New Brunswick Health Research  
6 Foundation. JJ would also like to acknowledge the logistic and financial support provided  
7 by the Centre de formation médicale du Nouveau-Brunswick to support this publication.  
8

9 **Competing interests** None declared.  
10

11 **Contributorship statement** All authors (Jalila Jbilou, Jean Grenier, Marie-Hélène  
12 Chominenne, France Talbot, Heather Tullock, Bianca D'Atono and Paul S. Greenman) have  
13 contributed significantly to the design of the project, the planning and the conduct of the  
14 data collection, they participated to the team work for the analysis of the data  
15 (development of the codebook, training of the research assistants (for first coding and  
16 codes' organization), discussions if consensus was not achieved and worked  
17 collaboratively on 2<sup>nd</sup> coding and conceptual categorization) and the discussion of the  
18 results. Jalila Jbilou and Jean Grenier prepared the first manuscript draft; all authors  
19 contributed to, review and approve the final manuscript.  
20  
21  
22

23 **Data sharing statement** All transcripts have been de-identified following ethical  
24 recommendations to protect participants' privacy and confidentiality. Unfortunately, we  
25 do not have consent from participants to share the full denominated data publicly.  
26 However, Codebooks or sections of the transcripts can be requested by contacting the  
27 corresponding author.  
28  
29  
30  
31  
32  
33  
34  
35  
36  
37  
38  
39  
40  
41  
42  
43  
44  
45  
46  
47  
48  
49  
50  
51  
52  
53  
54  
55  
56  
57  
58  
59  
60



## BIBLIOGRAPHY

1. Tully PJ, Cosh SM, Baumeister H. The anxious heart in whose mind? A systematic review and meta-regression of factors associated with anxiety disorder diagnosis, treatment and morbidity risk in coronary heart disease. *Journal of Psychosomatic Research*. 2014.
2. Greenman PS, Viau P, Morin F, Lapointe-Campagna MÈ, Grenier J, Chomienne MH, et al. Of Sound Heart and Mind: A Scoping Review of Risk and Protective Factors for Symptoms of Depression, Anxiety, and Posttraumatic Stress in People with Heart Disease. *J Cardiovasc Nurs*. 2018;33(5):E16–28.
3. Jankowska K, Jacek P, Jankowski K. Psychocardiology - forgotten science in the service of cardiovascular disease prophylaxis Paula Katarzyna Jankowska 1 , Krzysztof Jacek Jankowski 1 , Ewa Rudnicka- Drożak 1 1 Chair and Department of Family Medicine, Medical University of Lublin. 2018;8(5):160–8.
4. Van Straten A, Hill J, Richards DA, Cuijpers P. Stepped care treatment delivery for depression: A systematic review and meta-Analysis. *Psychol Med*. 2015;45(2):231–46.
5. van der Feltz-Cornelis CM, Nuyen J, Stoop C, Chan J, Jacobson AM, Katon W, et al. Effect of interventions for major depressive disorder and significant depressive symptoms in patients with diabetes mellitus: A systematic review and meta-analysis. *Gen Hosp Psychiatry [Internet]*. 2010;32(4):380–95. Available from: <http://dx.doi.org/10.1016/j.genhosppsy.2010.03.011>
6. Davidson KW, Bigger JT, Burg MM, Carney RM, Chaplin WF, Czajkowski S, et al. Centralized, stepped, patient preference-based treatment for patients with post-acute coronary syndrome depression: CODIACS vanguard randomized controlled trial. *JAMA Intern Med*. 2013;173(11):997–1004.
7. Kronish IM, Rieckmann N, Burg MM, Edmondson D, Schwartz JE, Davidson KW. The effect of enhanced depression care on adherence to risk-reducing behaviors after acute coronary syndromes: Findings from the COPES trial. *Am Heart J [Internet]*. 2012;164(4):524–9. Available from: <http://dx.doi.org/10.1016/j.ahj.2012.07.024>
8. Galdas PM, Harrison AS, Doherty P. Gender differences in the factors predicting initial engagement at cardiac rehabilitation. *Open Hear [Internet]*. 2018;5(1):e000764. Available from: <http://openheart.bmj.com/lookup/doi/10.1136/openhrt-2017-000764>
9. Samayoa L, Grace SL, Gravely S, Scott LB, Marzolini S, Colella TJF. Sex differences in cardiac rehabilitation enrollment: A meta-analysis. *Can J Cardiol [Internet]*. 2014;30(7):793–800. Available from: <http://dx.doi.org/10.1016/j.cjca.2013.11.007>

10. Angus JE, King-Shier KM, Spaling MA, Duncan AS, Jaglal SB, Stone JA, et al. A secondary meta-synthesis of qualitative studies of gender and access to cardiac rehabilitation. *J Adv Nurs*. 2015;71(8):1758–73.
11. Yin RK. *Case study research: Design and methods*. Thousand Oaks; CA: Sage Publications; 2013.
12. Smith JA. *Qualitative psychology: A practical guide to research methods*. 3rd ed. Los Angeles: Sage Publications; 2015. 301 p.
13. Tong A, Sainsbury P, Craig J. Consolidated criteria for reporting qualitative research (COREQ): a. *Int J Qual Heal Care* [Internet]. 2007;19(6):349–57. Available from: <http://intqhc.oxfordjournals.org/content/19/6/349.abstract><http://dx.doi.org/10.1093/intqhc/mzm042><https://www.ncbi.nlm.nih.gov/pubmed/17872937> %0AAll Papers/T/Tong et al. 2007 - Consolidated criteria for reporting qualitative research (COREQ) - a 32-i
14. Rodham K, Fox F, Doran N. Exploring analytical trustworthiness and the process of reaching consensus in interpretative phenomenological analysis: lost in transcription. *Int J Soc Res Methodol* [Internet]. 2015;18(1):59–71. Available from: <http://web.a.ebscohost.com.libproxy.boisestate.edu/ehost/pdfviewer/pdfviewer?vid=1&sid=a0afd31c-7f55-4b49-a60d-b7e066912a97%40sessionmgr4010>
15. Eatough V, Smith JA. Interpretative phenomenological analysis. In: *Handbook of Qualitative Research in Psychology*. SAGE Publications Ltd; 2017. p. 193.
16. Miles MB, Huberman AM, Saldana J. *Qualitative Data Analysis: A Methods Sourcebook*. 3rd ed. Arizona State University, USA: Sage Publications Inc.; 2014. 408 p.
17. Gwet KL. *Handbook of inter-rater reliability: The definitive guide to measuring the extent of agreement among raters*. 4th ed. Advanced Analytics; LLC.; 2014.
18. Punjani N, Flannigan R, Oliffe JL, McCreary DR, Black N, Goldenberg SL. Unhealthy Behaviors Among Canadian Men Are Predictors of Comorbidities: Implications for Clinical Practice. *Am J Mens Health*. 2018;12(6):2183–93.
19. Thorne S, Hislop TG, Kim-Sing C, Oglov V, Oliffe JL, Stajduhar KI. Changing communication needs and preferences across the cancer care trajectory: Insights from the patient perspective. *Support Care Cancer*. 2014;22(4):1009–15.
20. Paterson C, Robertson A, Smith A, Nabi G. Identifying the unmet supportive care needs of men living with and beyond prostate cancer: A systematic review. *Eur J Oncol Nurs* [Internet]. 2015;19(4):405–18. Available from: <http://dx.doi.org/10.1016/j.ejon.2014.12.007>

- 1  
2  
3  
4  
5  
6  
7  
8  
9  
10  
11  
12  
13  
14  
15  
16  
17  
18  
19  
20  
21  
22  
23  
24  
25  
26  
27  
28  
29  
30  
31  
32  
33  
34  
35  
36  
37  
38  
39  
40  
41  
42  
43  
44  
45  
46  
47  
48  
49  
50  
51  
52  
53  
54  
55  
56  
57  
58  
59  
60
21. Elliott K. Challenging toxic masculinity in schools and society. *Horiz.* 2018;26(1):17–22.
  22. Seidler ZE, Dawes AJ, Rice SM, Oliffe JL, Dhillon HM. The role of masculinity in men’s help-seeking for depression: A systematic review. *Clin Psychol Rev* [Internet]. 2016;49:106–18. Available from: <http://dx.doi.org/10.1016/j.cpr.2016.09.002>
  23. Galdas PM, Johnson JL, Percy ME, Ratner PA. Help seeking for cardiac symptoms: Beyond the masculine-feminine binary. *Soc Sci Med* [Internet]. 2010;71(1):18–24. Available from: <http://dx.doi.org/10.1016/j.socscimed.2010.03.006>
  24. Galdas P, Darwin Z, Kidd L, Blickem C, McPherson K, Hunt K, et al. The accessibility and acceptability of selfmanagement support interventions for men with long term conditions: A systematic review and meta-synthesis of qualitative studies. *BMC Public Health.* 2014;14(1).

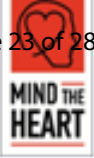

## APPENDIX 1

### « MIND THE HEART » PROJECT

#### FOCUS GROUP DISCUSSION GUIDE

##### ENGLISH VERSION

### INTRODUCTION

Thank you for agreeing to participate in this focus group discussion. This discussion is part of a multi-site participatory action research project, « MindTheHeart », funded by Movember Foundation Canada and the New Brunswick Health Research Foundation that aims at raising awareness for psychologically healthy workplaces for men living with or at risk of HD.

The purpose of this focus group is for the research team to understand the needs, expectations and preferences of men at risk of or living with HD, with regard to interventions such as mental health promotion, mental health prevention, and mental health interventions for MD/AD/TRD. The information gathered will help the research team to design interventions that meet the specific needs of men with HD to prevent or early detect and treat co-occurring mental health issues.

Before we start the discussion, allow us to clarify some points.

1. Could you all kindly verify that you have already signed the consent forms stating your voluntary participation in this focus group?

Yes

No

2. The duration of the focus group discussion will take 90 to 120 minutes in which you have the right to leave the group at any point in time.
3. The whole session will be audio recorded to ensure the accuracy of the information that you provide. However the consent forms that you have signed will ensure that all the information that you share today shall be confidential and anonymous.
4. Please note that each of you confirms that you are aware that anything said during the meeting has to be kept confidential and that you understand that you are not allowed to disclose any information or any names related to this focus group.

Would anyone like to ask any question or has any clarification related to this focus group before we start?

Before we start, could you please take a few minutes to complete this general information sheet? (Give them the information sheet below)

Date: \_\_\_\_\_

**The objective of the following form is to collect general information about you. You can be assured that the information collected will remain confidential and anonymous.**

- 1- Age
- 2- City of residence
- 3- Familial status (tick as apply).
  - Single (never married)
  - Married
  - Common law partner
  - Divorced
  - Widow
  - Other (specify): \_\_\_\_\_.
- 4- Level of education: (tick as apply).
  - Not schooled
  - Primary
  - Secondary
  - College
  - University
  - Other (specify): \_\_\_\_\_.
- 5- Employment status: (tick as apply).
  - Employed
  - Retired
  - Sick leave
- 6- Preferred language for health services (tick all that applies).
  - French
  - English
  - Others (specify): \_\_\_\_\_.
- 7- What is your ethnicity? (tick all that applies).
  - White/Caucasian
  - Black (ex., Haitian, African, Jamaican, Somalia)
  - Latino/Hispanic
  - Asiatic (ex., Chinese, Japanese, Vietnamese)
  - Middle East
  - Native/First Nation/Mixed-Race
  - Pacific Island
  - Other (specify): \_\_\_\_\_.

#### Health status

- 1- Are you suffering from, have you ever suffered from or are you at risk of heart disease?  
(if yes, please specify)
- 2- Are you suffering from a mental health issue?  
(if yes, please specify)

## FOCUS GROUP DISCUSSION GUIDE

### A. Patient Experience

How would you describe your experience with the mental health issues that you have been experiencing following your HD?

- Physical well-being (performing your daily activities, energy levels and physical activity)
- Emotional well-being (interest in sex, experienced feelings, mood and relationships with others)
- Mental health issues (mood and anxiety, ability to make 'good' decisions and be productive)
- Financial situation
- Employment situation (absence from work, productivity, demotions, arguments with colleagues and supervisors, stigma, loss (advantages, respect, confidence...))
- For many men, self-reliance and being competitive are important characteristics. How about you? What are important manly characteristics for you? How might that have changed with HD and mental health issues?
- How do you deal with those changes?

### B. Health Promotion and Prevention Needs

What do you know about the link between HD and mental health issues in men?

- Health literacy/Knowledge/Health education
- What do you wish you had known or done that might have helped you avoid HD and mental health issues?
- For other men experiencing HD and mental health issues, what are the most important pieces of information about the link between HD and mental health issues and how might they be best conveyed?

Regarding risk reduction for HD and mental health issues: What kind of information about mental health and HD do you think will be most useful for you?

- Type of information (statistics, recommendations, health advice, explanations...)
- Communication channels: (read, audio or visual media, seminars, peer education, educational materials, others specify...)
- Location of information delivery (workplace, health care services, community, media)
- Timeliness of information delivery (moment/delay)
- Websites, apps, social media, men testimonies as a source of information, interest and use

### C. Health Services and Clinical Care

What is your experience with the health care that you were provided due to your HD and mental health issues needs in the last five years?

- How connected are you to the health care system and specialist heart and mental health services?
- Relevance of care: Many men tell us they don't want to rely on medications to ensure their mental health or treat specific ailments such as depression? What is your perspective/experience? What is your advice to health care providers about working with male patients who have experienced HD and/or mental health issue?
- Utilization of services: Lots of men are reticent to use professional mental health services – why might that be? What about you, what challenges did you have in seeking heart or mental health care?
- Availability and access to care? (existence of men-sensitive services, factors related to utilization of services: psychologist, insurance coverage, social services...)
- What were some of the areas that you suggest be improved? (your expectations)

Could you please describe your experience with your health care professional (family doctor, cardiologist, nutritionist, kinesiologist, social worker, psychologist, and counselor) regarding information about mental health issues and heart disease?

- Information/Education provided: What type of patient are you? One who likes to be told what to do or would you rather be more involved in the decision making and strategies? Please provide an example of that round your HD and/or mental health issues?
- Perceived expectations and needs
- Patient/Clinicians dynamics (communication, relationship, openness, empathy and shared-decision making)
- Proposed improvements: Can you provide an example of a positive interaction/relationship with a specific health care professional? What are the characteristics of a great health care professional?
- How does the gender of the health care professional influence that relationship?
- Some men like to lead – others like clear instructions. What is your preference and experience of interacting with health care professional?

## Consolidated criteria for reporting qualitative studies (COREQ): 32-item checklist

Developed from:

Tong A, Sainsbury P, Craig J. Consolidated criteria for reporting qualitative research (COREQ): a 32-item checklist for interviews and focus groups. *International Journal for Quality in Health Care*. 2007. Volume 19, Number 6: pp. 349 – 357

**YOU MUST PROVIDE A RESPONSE FOR ALL ITEMS. ENTER N/A IF NOT APPLICABLE**

| No. Item                                       | Guide questions/description                                                                                                                                                                                                                                                                                 | Reported on Page #                                  |
|------------------------------------------------|-------------------------------------------------------------------------------------------------------------------------------------------------------------------------------------------------------------------------------------------------------------------------------------------------------------|-----------------------------------------------------|
| <b>Domain 1: Research team and reflexivity</b> |                                                                                                                                                                                                                                                                                                             |                                                     |
| <i>Personal Characteristics</i>                |                                                                                                                                                                                                                                                                                                             |                                                     |
| 1. Interviewer/facilitator                     | All authors conducted the focus group or the semi-structured interview                                                                                                                                                                                                                                      | Method- Page4                                       |
| 2. Credentials                                 | JJ PhD, MD<br>JG PhD, CPsych<br>MHC MSc, MD<br>FT PhD, LPsych<br>HT CPsych<br>BD'A PhD<br>PSG PhD, CPsych                                                                                                                                                                                                   | Title page-1                                        |
| 3. Occupation                                  | What was their occupation at the time of the study? Researchers, Clinicians or both.                                                                                                                                                                                                                        | -                                                   |
| 4. Gender                                      | Was the researcher male or female? Males (JG, PSG) and Females (JJ, MHC, FT, HT, BD'A)                                                                                                                                                                                                                      | -                                                   |
| 5. Experience and training                     | What experience or training did the researcher have? A MindTheHeart manual for the qualitative study was developed. Training was offered to the researchers and the research staff involved in this study.                                                                                                  | Methods-Page 5                                      |
| <i>Relationship with participants</i>          |                                                                                                                                                                                                                                                                                                             |                                                     |
| 6. Relationship established                    | Was a relationship established prior to study commencement? No                                                                                                                                                                                                                                              | -                                                   |
| 7. Participant knowledge of the interviewer    | What did the participants know about the researcher? Ethical approval had been granted from REB in all participating sites.<br><br>Participants reviewed the project's information sheet and had the opportunity to ask their questions to the interviewers prior to giving their written informed consent. | Ethical approval-<br>Page 15-16<br><br>Method-Page4 |



|                                          |                                                                                                                                                                                                                                                                                                                                                                                                                                                                                  |                |
|------------------------------------------|----------------------------------------------------------------------------------------------------------------------------------------------------------------------------------------------------------------------------------------------------------------------------------------------------------------------------------------------------------------------------------------------------------------------------------------------------------------------------------|----------------|
| 8. Interviewer characteristics           | What characteristics were reported about the inter viewer/facilitator? e.g. Bias, assumptions, reasons and interests in the research topic<br>No interviewer-related bias was identified.                                                                                                                                                                                                                                                                                        | -              |
| <b>Domain 2: study design</b>            |                                                                                                                                                                                                                                                                                                                                                                                                                                                                                  |                |
| <i>Theoretical framework</i>             |                                                                                                                                                                                                                                                                                                                                                                                                                                                                                  |                |
| 9. Methodological orientation and Theory | What methodological orientation was stated to underpin the study? e.g. grounded theory, discourse analysis, ethnography, phenomenology, content analysis<br>Open and axial coding with interpretative phenomenological analysis.                                                                                                                                                                                                                                                 | Methods-Page 5 |
| <i>Participant selection</i>             |                                                                                                                                                                                                                                                                                                                                                                                                                                                                                  |                |
| 10. Sampling                             | How were participants selected? e.g. purposive, convenience, consecutive, snowball<br>Convenience samples<br>The inclusion criteria were: 1) to be 19 and over in New-Brunswick, and 18 and over in Ontario and Quebec; 2) to have had a myocardial infarction, unstable angina, or heart surgery in the last 5 years with or without depression, anxiety or PTSD; 3) to be able to read and speak English or French; and 4) to be willing to participate in a group discussion. | Methods-Page 4 |
| 11. Method of approach                   | How were participants approached? e.g. face-to-face, telephone, mail, email<br>To recruit participants we used a combination of active strategies (patients' solicitation at participating cardiac rehabilitation programs and a snowball technique) and passive strategies (radio broadcasts and local newspapers advertisement).                                                                                                                                               | Methods-Page 4 |
| 12. Sample size                          | How many participants were in the study?<br>93 men                                                                                                                                                                                                                                                                                                                                                                                                                               | Results-Page 5 |
| 13. Non-participation                    | How many people refused to participate or dropped out? Reasons?                                                                                                                                                                                                                                                                                                                                                                                                                  | -              |
| <i>Setting</i>                           |                                                                                                                                                                                                                                                                                                                                                                                                                                                                                  |                |
| 14. Setting of data collection           | Where was the data collected? e.g. home, clinic, workplace<br>At the University or the hospital                                                                                                                                                                                                                                                                                                                                                                                  | Methods-Page 4 |
| 15. Presence of non-participants         | Was anyone else present besides the participants and researchers? No                                                                                                                                                                                                                                                                                                                                                                                                             | -              |
| 16. Description of sample                | What are the important characteristics of the sample? e.g. demographic data, date<br>Data presented in a Table (Table 1)                                                                                                                                                                                                                                                                                                                                                         | Results-Page 6 |

|                                        |                                                                                                                                                                                                                                       |                                      |
|----------------------------------------|---------------------------------------------------------------------------------------------------------------------------------------------------------------------------------------------------------------------------------------|--------------------------------------|
| <i>Data collection</i>                 |                                                                                                                                                                                                                                       |                                      |
| 17. Interview guide                    | Were questions, prompts, guides provided by the authors? Yes<br><br>Was it pilot tested? The guide was reviewed by four patients who did not participate to the study.                                                                | Appendix1 Guide<br><br>Method-Page 4 |
| 18. Repeat interviews                  | Were repeat inter views carried out? If yes, how many? No                                                                                                                                                                             | -                                    |
| 19. Audio/visual recording             | Did the research use audio or visual recording to collect the data? Audio                                                                                                                                                             | Methods-Page 4                       |
| 20. Field notes                        | Were field notes made during and/or after the inter view or focus group? Yes                                                                                                                                                          | Methods-Page 5                       |
| 21. Duration                           | What was the duration of the inter views or focus group? Each focus group consisted of three to six participants and lasted approximately two hours (+/- 35 minutes). The semi-structured interview lasted between 60 and 90 minutes. | Results-Page 5                       |
| 22. Data saturation                    | Was data saturation discussed?                                                                                                                                                                                                        | Methods-Page 4                       |
| 23. Transcripts returned               | Were transcripts returned to participants for comment and/or correction? No                                                                                                                                                           | -                                    |
| <b>Domain 3: analysis and findings</b> |                                                                                                                                                                                                                                       |                                      |
| <i>Data analysis</i>                   |                                                                                                                                                                                                                                       |                                      |
| 24. Number of data coders              | How many data coders coded the data? 12 coders                                                                                                                                                                                        | Methods-Page 5                       |
| 25. Description of the coding tree     | Did authors provide a description of the coding tree? No                                                                                                                                                                              | -                                    |
| 26. Derivation of themes               | Were themes identified in advance or derived from the data? Derived from the data                                                                                                                                                     | Methods-Page 5                       |
| 27. Software                           | What software, if applicable, was used to manage the data?                                                                                                                                                                            | NVivo 11 Pro                         |
| 28. Participant checking               | Did participants provide feedback on the findings? Yes                                                                                                                                                                                | Strengths and limitations            |
| <i>Reporting</i>                       |                                                                                                                                                                                                                                       |                                      |
| 29. Quotations presented               | Were participant quotations presented to illustrate the themes/findings? Was each quotation identified? e.g. participant number Yes                                                                                                   | Results                              |
| 30. Data and findings consistent       | Was there consistency between the data presented and the findings? Yes, mainly                                                                                                                                                        | Discussion                           |
| 31. Clarity of major themes            | Were major themes clearly presented in the findings? Yes                                                                                                                                                                              | Results                              |
| 32. Clarity of minor themes            | Is there a description of diverse cases or discussion of minor themes? Yes                                                                                                                                                            | Discussion                           |

# BMJ Open

## Understanding men's psychological reactions and experience following a cardiac event: A qualitative study from the MindTheHeart Project

|                                 |                                                                                                                                                                                                                                                                                                                                                                                                                                                                                                                                                                                                                                                                                                                                                                                        |
|---------------------------------|----------------------------------------------------------------------------------------------------------------------------------------------------------------------------------------------------------------------------------------------------------------------------------------------------------------------------------------------------------------------------------------------------------------------------------------------------------------------------------------------------------------------------------------------------------------------------------------------------------------------------------------------------------------------------------------------------------------------------------------------------------------------------------------|
| Journal:                        | <i>BMJ Open</i>                                                                                                                                                                                                                                                                                                                                                                                                                                                                                                                                                                                                                                                                                                                                                                        |
| Manuscript ID                   | bmjopen-2019-029560.R2                                                                                                                                                                                                                                                                                                                                                                                                                                                                                                                                                                                                                                                                                                                                                                 |
| Article Type:                   | Original research                                                                                                                                                                                                                                                                                                                                                                                                                                                                                                                                                                                                                                                                                                                                                                      |
| Date Submitted by the Author:   | 07-Sep-2019                                                                                                                                                                                                                                                                                                                                                                                                                                                                                                                                                                                                                                                                                                                                                                            |
| Complete List of Authors:       | Jbilou, Jalila; Universite de Moncton, Psychology; Universite de Moncton, Centre de formation médicale du Nouveau Brunswick<br>Grenier, Jean; Hopital Montfort, Institut du Savoir Montfort<br>Chomienne, Marie-Helene; University of Ottawa, Family Medicine; University of Ottawa, School of Epidemiology and Public Health<br>Talbot, France; Universite de Moncton, Psychology<br>Tulloch, Heather; University of Ottawa, University of Ottawa Heart Institute, Cardiac Prevention and Rehabilitation<br>D'Antono, Bianca; Universite de Montreal, Psychology Department and Research Centre at the Montreal Heart Institute<br>Greenman, Paul; Universite du Quebec en Outaouais, Département de Psychoéducation et de Psychologie; Hopital Montfort, Institut du Savoir Montfort |
| <b>Primary Subject Heading</b>: | Mental health                                                                                                                                                                                                                                                                                                                                                                                                                                                                                                                                                                                                                                                                                                                                                                          |
| Secondary Subject Heading:      | Qualitative research                                                                                                                                                                                                                                                                                                                                                                                                                                                                                                                                                                                                                                                                                                                                                                   |
| Keywords:                       | Depression & mood disorders < PSYCHIATRY, QUALITATIVE RESEARCH, REHABILITATION MEDICINE, Coronary heart disease < CARDIOLOGY, Ischaemic heart disease < CARDIOLOGY, Myocardial infarction < CARDIOLOGY                                                                                                                                                                                                                                                                                                                                                                                                                                                                                                                                                                                 |
|                                 |                                                                                                                                                                                                                                                                                                                                                                                                                                                                                                                                                                                                                                                                                                                                                                                        |

SCHOLARONE™  
Manuscripts

## Understanding men's psychological reactions and experience following a cardiac event: A qualitative study from the MindTheHeart Project

---

**Authors:** Jalila Jbilou PhD, MD; Jean Grenier PhD, CPsych; Marie-Hélène Chomienne MSc, MD; France Talbot PhD, LPsych; Heather Tulloch PhD, CPsych; Bianca D'Antono PhD; Paul S. Greenman PhD, CPsych on behalf of the MindTheHeart Project Team

- **Corresponding author:** Jalila Jbilou, 18 Ave Antonine Maillet, Moncton E1A3E9 New Brunswick, Canada. [jalila.jbilou@umoncton.ca](mailto:jalila.jbilou@umoncton.ca) Tel: 1-506-858-4931
- **Co-authors:**
  - Jean Grenier, Institut du Savoir Montfort, Hôpital Montfort, Ottawa, Canada
  - Marie-Hélène Chomienne, Department of Family Medicine, and School of Epidemiology and Public Health, University of Ottawa, Ottawa, Canada
  - France Talbot, School of psychology, Université de Moncton, Moncton, Canada
  - Heather Tulloch, University of Ottawa Heart Institute, Cardiac Prevention and Rehabilitation, Ottawa, Canada
  - Bianca D'Antono, Psychology Department, Université de Montréal, and Research Centre, Montreal Heart Institute, Montreal, Canada
  - Paul S. Greenman, Département de psychoéducation et de psychologie, Université du Québec en Outaouais, Gatineau, Canada and Institut du Savoir Montfort, Hôpital Montfort, Ottawa, Canada.
- Word count (6356 words), excluding title page, abstract, references, figures and tables.



## Abstract:

**Objectives:** Emotional issues such as depression, anxiety, and post-traumatic stress disorder are common following a cardiac event. Despite their high prevalence, they often go undiagnosed and research suggests that men in particular are at higher risk. Therefore a better understanding of men's experiences with a cardiac event and ensuing health services is key for adapting approaches that meet their needs. The aim of this study was to describe the self-reported emotional challenges that men face following a cardiac event and to understand their patterns of psychosocial adjustment.

**Design** Qualitative study (focus groups and one-on-one interviews) using an interpretive phenomenological analysis.

**Setting** Clinical settings (Cardiac departments in hospitals, Cardiac rehabilitation programs and family medicine clinics) and in the community in three Canadian provinces. **Participants** A total of 93 men participated in the study through 22 focus groups and 5 semi-structured interviews, none have been excluded based on comorbidities. **Results** Four major themes emerged: 1) Managing uncertainty and adversity; 2) Distancing, normalizing, and accepting; 3) Conformity to traditional masculine norms; and 4) Social, literacy and communication challenges.

**Conclusions** Health professionals caring for men following a cardiac event must be aware of the psychological and social adjustments that accompany the physical challenges. However, there is a lack of explicit guidelines, tools and clinical training in men-sensitive approaches. Further research is required to better inform clinical practices and healthcare services.

## Strengths and limitations of this study

This is the first large qualitative study in Canada that provides an in-depth understanding of psychological reactions and experiences in men following a cardiac event.

This study provides comprehensive insight into major dimensions that need to be considered in future intervention research that aims to improve men-sensitive psychocardiology services.

The qualitative data analysis process included a three-round approach to ensure inter-coder reliability and to control for subjectivity.

This study did not include men from cultural minorities or Indigenous populations; hence, the findings may not have captured the needs and lived experiences of these populations.

We did not systematically recruit or conduct analyses by age, cardiac diagnosis or comorbidities and different themes may have emerged across these factors. Also we did not take into account when the event had occurred in relation to the data collection, hence this may have introduced different perceptions if the event was recent vs more than a few years past.

## 1. Introduction

Emotional issues such as depression, anxiety, and post-traumatic stress disorder (PTSD) are common among patients who experience a major cardiac event (i.e. acute coronary syndrome (ACS)) [1]. Despite high prevalences, these symptoms and psychological disorders often go undiagnosed and contribute to an increased risk of related morbidity and mortality, as well as social and economic vulnerability [2]. Psychocardiology, or clinical psychology in cardiac settings, is the science and practice of applying psychological knowledge to the prevention, treatment, and rehabilitation of patients with cardiac disease [3]. From this perspective, psychological and cardiac issues are interdependently addressed by collaborative interprofessional teams through patient-centred approaches.

Stepped-care models include a continuum of mental health interventions and services required to provide adequate health services and support in the most cost-efficient manner, based on patients' needs and choices. These models have shown effectiveness with different health conditions, including cardiac disease [4–7]. However, the last two decades of research in psychocardiology show that less than 25% of men with ACS engage in secondary prevention delivered by cardiac rehabilitation centres, seek support, or use appropriate timely interventions for their psychological distress and mental health [8–10]. Implementing effective psychocardiology stepped-care services for this population would require taking into account the social and behavioural determinants of men's health. To our knowledge, no research has been conducted on the acceptability and feasibility of a stepped-care model approach to psychological treatment that has been specifically designed to be sensitive to the needs and expectations of men with cardiac disease.

The MindTheHeart program, an innovative psychocardiology initiative launched in three Canadian provinces, aims to improve the prevention, early detection, and treatment of depression, anxiety, and PTSD in men following a cardiac event. The cornerstone of this program was to design and test the feasibility and acceptability of a stepped-care approach to treatment structured into: Step 1: Psychoeducational intervention, Step 2: Group therapy including sessions with a significant other, and Step 3: Individual or couple therapy based on patient preference.

To appropriately design and tailor this stepped-care model to the needs of men following a cardiac event, it was essential to gain a better understanding of their experience with cardiac disease and existing health services (or lack thereof). For the purpose of this article, our aims are to describe the self-reported emotional challenges that men face following a cardiac event and to understand their patterns of psychosocial adjustment.

## 2. Methods

### 2.1. Study design

A qualitative study was conducted using an inductive phenomenological qualitative approach to provide a detailed description of the experience of men with cardiac disease while staying true to the collected qualitative data [11,12]. The consolidated criteria for reporting qualitative research (COREQ) were used to structure this study and ensure its methodological quality [13].

### 2.2. Participants

Convenience samples were recruited through cardiac rehabilitation programs and cardiac departments or clinics at teaching hospitals as well as in the community in three Canadian provinces: New Brunswick, Ontario and Quebec. To recruit participants we used a combination of both active (patient solicitation at participating cardiac rehabilitation programs and a snowball technique) and passive (radio broadcasts and advertisements in local newspapers) strategies. The inclusion criteria were: 1) to be 19 and over in New Brunswick, and 18 and over in Ontario and Quebec; 2) to have had a myocardial infarction, unstable angina, or heart surgery in the last 5 years with or without depression, anxiety or PTSD; 3) to be able to read and speak English or French; 4) to be able to provide informed consent; and 5) willing to participate in a group discussion. A sampling frame was developed to capture variation in age, marital status, cardiac health, mental health conditions, spoken language (French or English), and socioeconomic status.

### 2.3. Data collection

Data collection took place between May 2016 and August 2017. The focus group qualitative technique was selected to gather information [12]. This technique is appropriate for exploring patients' experience and perspective through a collective discussion. Interactions and discussions between participants are encouraged. Experiences and opinions are shared and explored while participants are questioning or challenging one another or disagreeing with one another. Initially, only focus groups were planned, but due to challenges in recruiting a sufficient number of participants (time constraints, limited availability due to summer vacations, reticence to partake in a group discussion), we also carried out a total of five (n=5) one-on-one semi-structured interviews to ensure inclusiveness. Focus group discussions were facilitated by two members of the research team using a discussion guide (See Appendix 1). A preliminary version of the guide was reviewed by four male patients (two French and two English) to assess its intelligibility and appropriateness. Psychology and medical research staff, including the authors, conducted the focus groups and semi-structured interviews.. The same interview guide was used for the semi-structured interviews, which were conducted either face-to-face or by telephone. Participants were aware of the study's aims and objectives. They had the opportunity to ask questions to the interviewers prior to giving written informed consent to participate. Focus groups and semi-structured interviews were conducted in English or French based on participants' preference and took place at either a hospital or university setting. Data collection continued until information and conceptual saturation was reached.



#### 2.4. Data analysis

The audio-taped focus groups and semi-structured interviews from the three provinces were transcribed verbatim and anonymized. When available, the field notes taken by interviewees were included in the analysis. An interpretative phenomenological analysis (IPA) was used to guide the thematic analysis of the data [14,15]. IPA is an inductive qualitative content analysis that allows for the description of patterns without *a priori* theories or models to guide the analysis. The aim of IPA is to explore in depth the participants' personal experiences, their meaning for them, how they make sense of these experiences, and what they would recommend to better meet their needs. The analytic approach followed iterations of thematic content analysis and codes were created through open and axial coding to capture emergent themes [16].

To effectively manage the amount of collected data, we organized a collaborative analytic team. The first author was responsible for the data analysis management process including the development of the MindTheHeart manual for the qualitative study, the delivery of data analysis training sessions and the development of a codebook. She acted as a referee when needed. To ensure consistency in data analysis, 10% of the transcribed verbatims were randomly selected and four analysts independently coded 10% of the material. This strategy allowed the calculation of the inter-coder reliability [17]. The inter-coder reliability check consisted of coding and comparing the findings of each of the coders (2X2). The Cohen coefficient was used to assess to what extent the data deviated from perfect reliability. A coefficient of 80% or more was considered appropriate. Once this was reached, we considered that all analysts were using the same interpretative approach and data were analysed in a complementary manner. We performed three rounds of inter-coder reliability tests and two rounds of data analysis training sessions to create a convergent analytic approach. The transcribed material was analyzed through a systematized analytic process under the shared server of NVivo11-Pro (QSR International, Doncaster, Victoria, Australia).

**Patient and Public Involvement:** Patients were not involved in the design of this study. Results were presented through public talks.

### 3. Results

A total of 22 focus groups (88 men) and 5 semistructured interviews (5 men) were carried out. In total, 93 men participated across the three provinces. Each focus group consisted of three to six participants and lasted 85 to 155 minutes (Mean= 147 minutes). The semi-structured interviews with single participants lasted between 60 and 90 minutes (Mean= 82 minutes). The sociodemographic characteristics of the participants are presented in Table 1. In terms of mental health status, we asked the following question: "Are you suffering from a mental health issue?". In the New Brunswick sample, three men reported suffering from depression, two reported suffering from depression and anxiety, and one reported PTSD. In the Ontario sample, four men reported having anxiety, three reported depression and one indicated having anxiety and depression. In the Quebec sample, two declared anxiety and one noted depression. Being self-reported, this information

1  
2  
3 presents with obvious limitations (i.e. lack of precision in regards to diagnosis and  
4 severity, based on patient interpretation, missing data). In terms of heart disease, we  
5 asked the following question: "Are you suffering from, have you ever suffered from, or  
6 are you at risk of heart disease?". All participating men declared currently suffering from  
7 at least one cardiac health condition, and having experienced at least one cardiac event.  
8 In the New Brunswick sample, 24 had experienced an ACS and nine had undergone open  
9 heart surgery (eight had Coronary artery bypass grafting (CABG) and one had a valve  
10 replacement). In Quebec, six men declared an ACS and two had undergone open heart  
11 surgery. Of the Ontario sample, three declared having undergone heart surgery and 23  
12 experienced an ACS. This information is again based on self-report, and thus presents  
13 with limitations (as previously noted).  
14  
15  
16  
17  
18  
19  
20  
21  
22  
23  
24  
25  
26  
27  
28  
29  
30  
31  
32  
33  
34  
35  
36  
37  
38  
39  
40  
41  
42  
43  
44  
45  
46  
47  
48  
49  
50  
51  
52  
53  
54  
55  
56  
57  
58  
59  
60

|                                                 | Age range (years)<br>Mean age (+/-SD) | Ethnicity                                                             | Education                                                  | Marital status                                                                                  | Employment status                                                                        | Language     |
|-------------------------------------------------|---------------------------------------|-----------------------------------------------------------------------|------------------------------------------------------------|-------------------------------------------------------------------------------------------------|------------------------------------------------------------------------------------------|--------------|
| <b>New Brunswick</b>                            |                                       |                                                                       |                                                            |                                                                                                 |                                                                                          |              |
| Focus groups – (8 groups for a total of 37 men) | 45 to 79<br>64.2 (+/- 9.7)            | Caucasian: 37                                                         | Secondary: 17<br>College: 4<br>University: 16              | Single: 3<br>Married: 25<br>Common law: 4<br>Divorced: 2<br>Widowed: 2<br>Widowed + Divorced: 1 | Employed: 13<br>Retired: 18<br>Employed + retired: 1<br>Semi-Retired: 2<br>Sick leave: 3 | 6 EN<br>2 FR |
| Semi-structured interviews (4 men)              | 45 to 54<br>51.5 (+/- 4.8)            | Caucasian: 4                                                          | Secondary: 1<br>College: 3                                 | Single: 2<br>Married: 2                                                                         | Employed: 3<br>Sick leave: 1                                                             | 3 EN<br>1 FR |
| <b>Ontario</b>                                  |                                       |                                                                       |                                                            |                                                                                                 |                                                                                          |              |
| Focus groups - (9 groups for a total of 36 men) | 51 to 90<br>65.8 (+/- 15.5)           | Caucasian: 34<br>Caucasian + Jewish: 1<br>Caucasian + First nation: 1 | Primary: 3<br>Secondary: 2<br>College: 7<br>University: 24 | Single: 1<br>Married: 19<br>Common law: 7<br>Separated: 2<br>Divorced: 7                        | Retired: 28<br>Sick leave: 3<br>Employed + retired: 5                                    | 4 EN<br>5 FR |
| <b>Quebec</b>                                   |                                       |                                                                       |                                                            |                                                                                                 |                                                                                          |              |
| Focus groups - (5 groups for a total of 15 men) | 45 to 75<br>67.5 (+/- 8.9)            | Caucasian: 15                                                         | Primary: 2<br>Secondary: 4<br>College: 4<br>University: 5  | Single: 2<br>Married: 9<br>Common law: 4                                                        | Employed: 1<br>Retired: 12<br>Sick leave: 1<br>Unemployed: 1                             | 1 EN<br>4 FR |
| Semi-structured interview (1 man)               | Not included to protect for privacy   |                                                                       |                                                            |                                                                                                 |                                                                                          |              |

**Table 1 Sociodemographic characteristics of participants**

EN: English; FR: French

1  
2  
3 Interpretive phenomenological analysis of the gathered qualitative data from the three  
4 provinces highlighted emotional issues, as well as patterns of psychosocial adjustment  
5 challenges, faced by men following a cardiac event. Emerging themes were categorized  
6 and are presented below. Quotes have been reproduced to illustrate key points. To  
7 preserve anonymity and confidentiality quotes were tagged using a pseudonym (male  
8 name). French quotes were translated into English for the purpose of this publication.  
9  
10

### 11 **3.1. Managing uncertainty and adversity**

12 A temporal sequence emerged across data as being instrumental in affecting men's  
13 experience following a cardiac event.  
14

#### 15 **"Not me, not now!" Denial reaction and delay in seeking help**

16  
17 Refusing to recognize the cardiac event and purposely delaying the hospital (emergency  
18 department) visit seems to be a prevailing behaviour among men. *"I was working, my  
19 back got very sore, and I broke out in a cold sweat, but I finished my shift. I knew ... it was  
20 my heart. So, I went home, showered, ate a little bit and had my last cigarette, cause I'm  
21 a smoker."* - **Gérard**. *"I rolled over in bed a couple of times when I should've gone to the  
22 hospital. Cause I know my wife would freak out, she'd be worried about me, right? And I  
23 know I'd be in the hospital for 12 hours, which would mean I couldn't go to work the next  
24 day. So I'm just going to roll over and just, you know, roll the dice on this, on this event,  
25 today, and see how it goes."* - **Tim**. *"I was home with chest pains. Not pain, but just  
26 pressure in my chest. Never for a minute, for a second, did I clue in that I had a heart  
27 problem on Thursday. I went back to work on Friday. Same pain, but when I sat down and  
28 rested, it went away. On Saturday I was home. I started my power saw to cut branches on  
29 trees and cut down a tree, and clean up the yard. And I only went to the doctor on Tuesday  
30 of the following week. Expecting to go there and he would say "Take a few tests and you'll  
31 go back home and we'll call you in a few weeks". Well, it changed when he said 'You're not  
32 going anywhere. You're going to be here a few days'. And I realised I was stupid. I  
33 should've gone on Thursday."* - **Gary**  
34  
35  
36  
37  
38  
39

40 Across discussions, two contrasting explanations for the denial reaction and delay in  
41 seeking help emerged: 1) the sense of invincibility perceived by younger men (30 to 50  
42 years old), as they did not see themselves at risk and could not understand or accept why  
43 they suffered a cardiac event: *"younger men are brought up to feel that they are a bit  
44 invincible, that you know, they're bullet proof and you know that doesn't happen to  
45 them"* - **Paul**, as well as by older men who had previously recovered from severe illnesses  
46 such as a heart attack or a cancer and perceived themselves as warriors, *"I survived a  
47 cancer before, I haven't much of a fear of dying"* - **Pat** and 2) the sense of vulnerability  
48 expressed by men who described the cardiac event as a loss (of control, of power, of  
49 dignity, and of autonomy) or a fear (of receiving a life-threatening diagnosis, of  
50 permanent incapacity or disability, of early retirement, or of death). An additional  
51 explanation mentioned across groups was the competing priorities of daily living and  
52 putting others above self *"it's hard to take time for yourself when you have a lot of  
53 obligations"* - **Marc**. Stressing about the lack of time and being busy is used to positively  
54  
55  
56  
57  
58  
59  
60

1  
2  
3 explain and justify the treatment-seeking delay behaviour. This type of avoidance  
4 behaviour in regards to seeking help was often perceived as being somewhat of a  
5 responsible and altruistic behaviour, thus making it more acceptable and meaningful and  
6 reinforcing the masculine gender role and its impact on engaging in help-seeking and  
7 treatment-seeking.  
8  
9

### 10 “What am I doing here? What’d be my life once I’m back home?”: The in-hospital 11 journey 12 13

14 The hospital stay, whose length varied according to the severity of the cardiac event, was  
15 most often described as very difficult, involving sleepless nights, worries, fear of death,  
16 and sometimes anger. Having to “stay in bed” was depicted as a failure, a loss of power  
17 and confidence, or an unfair situation. *“It changed my life totally. Like, you know, I was  
18 pretty confident, pretty, you know, I was a supervisor at my work, captain of my team,  
19 just, you know, that 10 feet tall and bulletproof. I wasn’t there anymore, right?”- Jacques*  
20 While reactions varied, one particular question transcended across groups: *“what would  
21 be my life once at home?”*. The anxiety generated by this question was discussed in groups  
22 as an important concern.  
23  
24  
25

26 Across groups, men typically shared that they were very satisfied with the care they  
27 received (i.e., procedures, medications, interactions with health professionals about their  
28 cardiac condition) during their hospital stay, but that one thing they tended to avoid  
29 discussing openly was their apprehension about life after hospitalization. Thus,  
30 uncertainty about life after hospitalization emerged as a dominant theme across groups  
31 when discussing in-hospital challenges. In-hospital uncertainty was further characterized  
32 by lack of, or inability to achieve, a clear understanding about the cardiac event, its impact  
33 on the body and daily functioning, eventual impact on one’s job or employability, and  
34 risks in terms of survival (fear of death). The main reasons why men experienced anxiety  
35 in the form of uncertainty about the future were that they (a) did not understand, or  
36 accept, the cardiac event; (b) did not feel in control of their future (how things are going  
37 to evolve?); (c) were intimidated by unintelligible medical terminology and high-tech  
38 procedures; and (d) apprehended the adjustments and the changes to be implemented  
39 once at home. Uncertainty about the future was associated with lack of self-confidence  
40 and was exacerbated by poor health communication on the part of professionals and in  
41 some cases the patients themselves, who were often reticent to share their concerns or  
42 to ask questions. Communication behaviours on the part of health care providers such as  
43 speaking in general terms and referring to population statistics (as opposed to using more  
44 precise and personalized information), only communicating via short conversations in a  
45 shared room while patients are in bed (as opposed to creating opportunities for asking  
46 questions in a more confidential environment), or providing unclear explanations using  
47 medical jargon (as opposed to clear explanations in lay terms), appear to play a critical  
48 role in generating and exacerbating feelings of uncertainty and apprehension about the  
49 future.  
50  
51  
52  
53  
54  
55  
56  
57  
58  
59  
60

### **“I’m not the man I used to be!”: Post-hospital discharge**

Returning home following a cardiac event was discussed as an important transitioning phase. Group discussions revealed that being told to “*slow down and stay home,*” even for a short period, was often experienced as unacceptable and devaluing. Post-hospital discharge, especially in the early going, was associated with psychological distress, frustration, and discomfort related to adopting the recommended lifestyle changes (e.g., lower sodium intake, eating more fruits and vegetables, quitting smoking), resting at home, and daily medication intake. Lack of understanding of medical advice and recommendations, lack of preparedness for the changes to be implemented, and the experience of having had a “*brush with death*” were mentioned as major stressors.

*“You know, the thing that stuck in my mind the most, of this whole episode... I talked to the surgeon before the operation, and he went through all the steps of what’s happening, and bottom line, there’s a 2% chance that you’re gonna die... That gets your attention”- Henry. “Like, this gentleman keeps saying “If it’s your time to go, it’s your time to go.” But for me, I’m not saying that I’m more or less important, but I have a young kid, so when your doctor tells you that you better make sure that your will is fully done and your financial situation is good cause you’re a ticking time bomb, at 40, I have a young kid and for me, it plays a lot in my head, right”-George. “What I found the hardest of all is before my operation and after, they told me what I could do, what I couldn’t” -Virgile*

Perceived control was identified as a dynamic cognitive process that fluctuated in response to the cardiac event. Men constantly attempted to retain or gain control during the rehabilitation phase and even beyond this period. Changes in environmental circumstances, such as being hospitalized for extended periods of time, re-hospitalization for complications and then being discharged home, impinged directly on their ability to feel in control of their daily lives. The process of gaining a better sense of control was facilitated by rationalizing, or making sense of a new phase in their treatment or illness prognosis or by gaining awareness of environmental challenges “*once you accept that you are restricted in your physical abilities it gets easier*”- **Paul.**

The post-hospital discharge and recovery process experience are mainly shaped by age, social connectedness (life partner, family, friends, and community involvement), psychological preparedness, personality, and economic status (finances, employment, etc.). Groups’ narratives revealed that feelings of powerlessness and sleep disturbances were experienced at all stages of the rehabilitation process and were often associated with the fear of dying. “*I was afraid for a long time to go to sleep. I would stay up for like three days until somebody slept with me more or less, right? My girlfriend at the time, we didn’t stay together every night, but if she wasn’t with me, I wouldn’t sleep. I was afraid to go to sleep and not wake up.*”-**Albert.**

### **3.2. Distancing, normalizing, and accepting**

Men reported that stepping back and reflecting on their own emotional reactions and experiences helped them make sense of their changing lives post-cardiac event. Two



1  
2  
3 perspectives emerged : experiencing it as a personal failure and/or as an opportunity (a  
4 second chance for a better life). In both perspectives, they were ready to accept this new  
5 normality and were ready for adjustment. *“Once you accept that you are restricted in your  
6 physical abilities it gets easier”-Bernard.* They reported using various strategies  
7 (spirituality, religion, faith, praying, introspection, meditation) as means to help them  
8 make sense of their cardiac event and accept the situation *“Well, I wouldn’t say I was  
9 completely free of worry for myself. Like the day before surgery, I went up to Sainte-Anne-  
10 De-Beaupré and I went to confession. So I was, you know. I wasn’t completely fearless,  
11 going in”-Paul.* *“Well you know there’s a lot of factors that impact on getting better  
12 support, prayer... I think prayer is a big thing, faith is a big thing too, you need to go for  
13 help”-Jack.* *“Spirituality helps, it gives you strenghts and courage. I think it’s a  
14 psychological thing”-Marc.*

15  
16  
17  
18  
19 Increased awareness of one’s mortality was described as a motivating factor to help them  
20 prioritize taking charge of their health. Redefining priorities with their life partner and  
21 family, or engaging in companionship was also described as helpful: *“My wife as well was  
22 very helpful, which means, she was not entirely too sympathetic which is, this is what you  
23 need to do, you know (laughs).”-Patrick* *“Like she took care of all my meds. Prior to the  
24 surgery, she wouldn’t even know what meds I was on. But after that, she was the one who  
25 knew what med, and when there were changes”- Albert.*

26  
27  
28 After being stabilized medically, reactions varied among men. Groups discussed three  
29 main reactions: (a) processing and reflecting on the lived experience and engaging in  
30 adopting a healthy lifestyle as a personal or family challenge, (b) taking the necessary time  
31 to process the traumatic event (to absorb the shock and understand what was happening)  
32 and then gradually exploring options and implementing changes, and (c) resisting and  
33 ignoring recommendations, using self-reliance and continuing the same lifestyle as before  
34 the cardiac event. *“I disregarded anything that my doctors were telling me, and I said that  
35 I had to take control of my own situation.”-Charles*

### 39 3.3. Conformity to traditional masculine norms

40 Dominant masculine norms can affect perceptions, acceptance, and normalization of the  
41 psychological distress following a cardiac event as well as help-seeking behaviours and  
42 mental health services utilization. *“Broken masculinity”* emerged as a transversal theme  
43 illustrating how deeply “masculinity and virility” were affected following a cardiac event.  
44 The functional limitations (i.e. staying at home, not driving, not shovelling snow, not lifting  
45 heavy weights), prescribed by their doctor or that were consequences of their heart  
46 condition and related medication (i.e. erectile dysfunction), were experienced as a major  
47 loss of manhood *“Well, weakness also. There’s a role. You’re the father, and there’s a role.  
48 And there’s responsibilities that go with that role. And you want to continue to do your  
49 job, as a father. And you don’t want to show them that you’re as vulnerable as you are at  
50 the moment. You kind of try to carry through. Which is tiring, cause then when they’re  
51 gone, you’re just wiped out. You just put everything. You put the whole day’s energy into  
52 that session with them.” – Jean-Pierre.* Perceiving their social role as “family  
53 breadwinner” or “family strong pillar” prevented men from sharing their emotions and  
54  
55  
56  
57



worries to their children or relatives. The altruistic behaviours, such as protecting relatives from worries, are valued by men and are used as intrinsic strategies to regain self-confidence and sense of manhood. *“Well, I have a 14 year old son, who looks up to me I’m sure. I’m his father. So, you know, sometimes when I’d see him, surely, I’d say after the surgery when you’re really not feeling yourself... You have to put on a game face because you really don’t want to show exactly how you feel to your children, cause they’re going to worry.” - Brian.*

The tendency to view and label certain behaviours as “feminine” as opposed to “masculine” seems to be an aggravating factor in terms of delaying or avoiding seeking help and using mental health services *“...women will tend much more to talk about it to their friends in regards to how they’re feeling. Where a man, sometimes it’s hard to share with your partner sometimes. You don’t want to show that sign of weakness, and that’s the way that I look at it.” – Bill* *“Suddenly you go through a heart attack and you will be like that (clic) the man they expect you to be, I mean the open minded... the touchy feel... you know... talking about private things... with people you don’t know, Oh wow! Not me...”-Greg* *“I find that women will talk to each other about emotions and how they feel. But how often do you go to work and sit down with one of your friends and start talking about your emotional problems? Not often. It’s just something that men don’t do”-Alban*

Men working in male-dominated workplaces (i.e., paramedics, police, military, construction, fishery industry) stressed the importance of educating people in their workplaces and of providing them with supportive tools and strategies. *“The other thing too is like, in the military, I was trained for 32 years to be macho. There’s no such thing as being depressed or tired or... you know what I mean? You’d just go out and do your thing, that’s just the way it was. And that training, today, is still instilled in me.”- Martin.*

#### 3.4. Social, literacy, and communication challenges

Following a cardiac event, men felt they had to change certain patterns within their lives and adjust to changes in their role as life partners, parents, and employees. There was a perception of loss of confidence in their physical capabilities and functioning in family and work relationships. Low social connectedness and support before the cardiac event was discussed in groups as a risk factor for cardiac disease and mental illness and as associated with poor mental functioning and quality of life during the recovery period. The quality and the intensity of family relationships as well as those with friends and co-workers varied over the course of recovery post-cardiac event and were dependant on men’s acceptance of the situation and their need for help. When discussing social support and its relevance for a healthy recovery, the necessary balance between expected and received support emerged as key. Indeed, while they found it sometimes difficult to share their thoughts and challenges with their relatives, men appreciated the attention, the compassion, the understanding, and the support of their life partner, family members, and friends. Supportive interpersonal relationships were viewed as helpful for breaking the cycle of distress and anxiety. The support received improved men’s trust in their ability to deal with the cardiac event, the cardiac rehabilitation, and the necessary

1  
2  
3 adjustments. However, men mentioned sometimes being irritated because of the  
4 overprotectiveness of some relatives. In particular, being under ‘*spouse’s management*’,  
5 they felt that they had lost part of their personal space, their independence and  
6 manhood. “*...All of a sudden, people feel, my wife in particular, well, here’s somebody*  
7 *who’s not an invalid, but we have to, you know, every time you do anything it’s well, you*  
8 *shouldn’t be doing this, you shouldn’t be doing that, you shouldn’t be... And that sort of*  
9 *affected me – it still does – more than any other things...*” – **Mark**.

12 Sexual problems developed in the aftermath of the cardiac event, either functional ones  
13 related to their ability to sustain an erection or to ejaculate (often side-effects of  
14 medications), or psychological ones that involved fears of exacerbating their heart  
15 condition if they were to engage in sexual activity, were described as a major concern.  
16 “*Sexually, I’m not the man I used to be. It’s just – and I blame it on the pills – it’s just that*  
17 *my life has changed drastically...I keep toying with the idea that maybe I should stop*  
18 *taking the pills, but I know that it’s gonna get me one way or the other... So... it’s really*  
19 *finding a sweet spot with the right medication.*”-**Wayne** “*you don’t have anymore the*  
20 *sexual drive, you know, that you had before*”-**Martin**

### 24 **Concerns about work**

26 As work is a significant aspect of personal and social identity, being on a long term sick  
27 leave may lead to feelings of shame and guilt or regarding oneself as incompetent,  
28 incapable, or physically weak. “*I’ve been out of work for a year and a half. I don’t want to*  
29 *go back there. I don’t want the stress of it. In the meantime, my work’s moving, so we’re*  
30 *all going to lose our jobs anyways. I’ve been there 22 years. So it’s just another stressor,*  
31 *right? And a lot of stuff outside of work, and it’s a helpless feeling.*”-**Paul**. “*I supervised*  
32 *the Giant Tiger warehouse. I couldn’t do that anymore. You know what I mean? Stuff like*  
33 *that, you know? The only thing I do anymore is play baseball. That’s just it...*”-**Richard**.  
34 Early returning to work, even against medical advice, is discussed as a problem-solving  
35 strategy to reinforce self-confidence and overcome stress. “*The cardiologist came, he*  
36 *says, “well, we have to do a triple bypass”. I looked at him, I said, “well, how long am*  
37 *gonna have to stay in the hospital?”. He said, “two weeks”. I says, “I don’t have time for*  
38 *that. I have to be back at work for the 29th*”-**Serge** “*after my heart attack, the only thing*  
39 *I wanted to do was get better so I could go back to work, ‘cause I’m only 52 and I need to*  
40 *work. So, that’s all about*”-**Georges**

### 45 **Health literacy, health communication and health services navigation**

46 Men’s health literacy was pointed out as a major challenge. The lack of understanding  
47 medical jargon and procedures emerged as an additional stressor and was described as a  
48 barrier for asking questions and seeking more information, explanations, or advice. The  
49 bidirectional association between cardiac health and mental health was unclear and not  
50 fully understood. Moreover, mental illness signs, symptoms, and diagnostic labels seem  
51 to interfere with the masculine ideals. Indeed, men did not identify themselves as  
52 “depressed”, “stressed”, or “anxious” but used restrictive vocabulary to express  
53 emotional distress like “low energy”, “challenged”, or “meeting temporary difficulties”.

1  
2  
3 Men valued the quality and human kindness associated with healthcare providers they  
4 had access to and described how the interactions, the conversations, and the alliance they  
5 had with them enhanced their compliance with treatment plans and improved their  
6 general mental and physical health status. *"...They gave me all the paperwork, all the  
7 stress things, charts and stuff, and my GP was great. She would ask me how my mental  
8 state was. I don't know guys like that. I appreciate it, but my doctors know her when I go  
9 in her office. She's in no hurry. If I'm sitting there crying for 15 minutes, she's there for 20  
10 with me. So, yeah, I'm very lucky. I have great doctors..."*- **Serge**

11  
12 Men put a strong emphasis on the quality of communication they had with health  
13 professionals, such as being listened to, not being rushed, receiving care with sympathetic  
14 attitude, being trusted and taken seriously *"I feel comfort. I feel comforted going to them.  
15 I really get a sense from my doctors that they really care about me."*-**William**.

16  
17  
18 However, the lack of time allocated by physicians to address emotional distress and  
19 social challenges following a cardiac event was reported as a barrier for access to  
20 supportive and caring services: *"You look at the doctor as being event-centered. In other  
21 words, he's there for a medical purpose. You have your 10 or your 15 minutes, and  
22 you're gone. You know, we're talking today about emotions, and this seems to be a time-  
23 consuming expensive exercise that at least the professionals I've dealt with haven't been  
24 available for. And you feel as though you're intruding on their importance, I guess, by,  
25 you know, having long chats and that sort of thing."*-**Patrick**. Men felt pressured by  
26 time: *"I just felt like I was just in and out like I was at a hair salon or something. You  
27 know, get this done, get the ECG done, and okay, see you later. Here's a prescription... I  
28 always felt like I was being rushed and brushed off. And so there was no relationship"*-  
29 **Mike**. *"You know, you've got your so many minutes. And I still think in our health system  
30 – and maybe not what's in the future – but if there was some minor pay for service, I  
31 think that would be helpful because you always feel you're on a sort of a diet of service.  
32 You're in; you're out, and of necessity. They move on to the next person."*-**Bruce**.

33  
34  
35  
36  
37  
38 The lack of knowledge about the health system and how to navigate services and  
39 manage medical information appeared to lead to the perception of the healthcare  
40 system as a "men-unfriendly space" where they feel discomfort and uncertainty: *"I think  
41 there's a problem with men as a whole, and you know, women seem so much more in  
42 tune with, you know, going to see the doctor for themselves, child birth, kids, I mean,  
43 when my son was ill, I never went to the doctor with him, my wife took him and it just  
44 wasn't a place I'd go; didn't know him very well, didn't know much about what to tell  
45 him"*-**Philip**. Moreover, the perceived conflicting information received from different  
46 health professionals increased anxiety and stress about how to manage health  
47 conditions and how to use health services. Men participating in cardiac rehabilitation  
48 programs reported the benefits of social interaction with other cardiac patients,  
49 identified as the "cardiac family". Sharing a similar health condition helps to normalize  
50 the challenges and accepting the "new reality".  
51  
52  
53  
54  
55  
56  
57  
58  
59  
60

#### 4. Discussion

This study aimed to describe the emotional issues and understand the patterns of psychosocial adjustment experienced by men following a cardiac event. Across the three Canadian provinces, participants showed homogeneity in reported experiences of the cardiac event, and its subsequent psychological reaction and social impact. Adaptation to the event, both psychologically and socially, did not appear to relate to geographical location but rather to intra-individual experiences and differences (ie., cultural norms, beliefs, relationships, etc.)... In the focus groups men opened up readily about their emotions and their vulnerabilities. They shared their experiences and difficulties in adapting and adjusting to their “new post-cardiac identity” as well as the need to accept new roles. They acknowledged that this adjustment needed to be worked out with their environment, their home, their family, their friends, and their workplace. Most often they found support through their partners and through peer support when they attended cardiac rehabilitation sessions. The focus group sessions helped to validate and normalize their initial reactions. They regretted that the health professionals they had encountered had not enquired in a systematic way about their mental well-being as they would about their physical symptoms or diet or exercise. This is certainly an aspect of practice that would be pertinent for health professionals to change.

One important overarching element that was brought forth by men was the lack of systematic attention given by healthcare professionals to the psychological consequences of having experienced a cardiac event. It was suggested that some professionals may bring up the subject, but in most instances, the question was not asked. Therefore, there seems to be a lack of consistency within the health system in regards to the attention paid to the psychological sequelae of heart disease. These aspects were reported in previous studies on various health conditions [18–20]. However, there is still a lack of clear and evidence-based guidelines and resources to support men-sensitive health communication as well as clinical practices to foster men’s mental health. This study also revealed how traditional masculine norms can affect the way men experience and seek help for emotional distress following a cardiac event, and how these behaviours affect their health and wellbeing. Tailoring and targeting clinical interventions may increase men's service uptake and the efficacy of treatments. Specific factors associated with men's access to, and engagement with mental health care are critical to increasing help-seeking, treatment uptake, and effectual self-management among men experiencing emotional distress following a cardiac event.

While the literature contains extensive reports on “toxic masculinity” as a major determinant of men’s health [21] or its impact on help-seeking in men [22], our study revealed “broken masculinity” to be an untold and unrecognized distress following a cardiac event. We found that men experienced a great deal of psychological anguish over the changes imposed by their cardiac illness, and that these changes were directly related to their sense of themselves as men in their family and in society. Our results confirm, as suggested by previous research, that it will be crucial to address these

concerns in a systematic way in order to combat symptoms of depression, anxiety, and post-traumatic stress in men following a cardiac event [23,24].

Our results corroborate and extend what other researchers have found concerning the psychological impact of a cardiac event. The sense of uncertainty, stress, discouragement, and sometimes hopelessness that many men in our sample talked about as they struggled to come to terms with heart disease and its effects on their personal and professional lives is consistent with the elevated levels of depression, anxiety, and post-traumatic stress reported among men (and women) elsewhere in the literature [1,2]. This sense of “broken masculinity” might be dangerous because it reflects, among other things, an espousal of attitudes and values that emphasize self-sufficiency and strength to such a degree that men refrain from addressing concerns related to their physical and mental health. Indeed, the results of previous studies [8,10] have indicated that traditional attitudes of this nature are related to poorer health outcomes in men than in women.

The lack of readily accessible and understandable information on the mental health aspects of heart disease that we noted in this study, along with the emotional, professional, and interpersonal challenges that men discussed, suggest that healthcare providers need to be better informed not only of the psychological consequences of heart disease but also of gender-specific ways of coping with them. Although there are examples of some initiatives that move in this direction (e.g., the Canadian Rehabilitation Network of Ontario, the Atlantic Cardiac Rehabilitation Network), to our knowledge there is not yet a comprehensive strategy for addressing themes like “broken masculinity” in male cardiac patients. For this reason, it is imperative to develop and implement interventions that will take into account the psychological impact of heart disease on men’s sense of self, their relationships, and their work, along with the importance of adopting more flexible attitudes about what it means to be a man (i.e., a strong man asks for help when he needs it; a strong man takes care of himself and of others).

### Limitations

The participants in this study were mostly in their sixties and over, which is representative of the population of men with cardiac disease. However, it would be of interest to study more specifically cardiac disease in men in their 30s, 40s, or 50s as cardiac disease is becoming more prevalent in these men.

The participants in our study were essentially white, with little or no representation of other ethnic groups or indigenous people. This may not be representative of larger urban Canadian settings.

Although our inclusion criteria indicated a cardiac event in the last 5 years, for some participants, the first event may have occurred some 10 years prior and there may have been changes in cardiac rehabilitation programs and health services. Moreover, the



1  
2  
3 responsiveness of health professionals at the time may have been different. A  
4 quantitative study exploring these aspects may allow to retrieve accurate information.  
5  
6

### 7 8 **Strengths**

9 This study is the first of its kind to delve into the subjective experience of men with heart  
10 disease and to examine the link between their reactions to their cardiac event and their  
11 mental health. We were able to detect key themes that are likely to resonate with most  
12 men who have heart disease, which could serve as a foundation for the development of  
13 intervention programs, i.e. the stepped-care model.  
14  
15

### 16 17 **5. Conclusion**

18 This paper highlights the significant emotions that arise following a cardiac event and how  
19 men attempt to counter them as best as they can. It is known that men have a tendency  
20 not to talk about their emotions or to express them differently than women do. Health  
21 professionals caring for men in these contexts must be aware of this and receive training  
22 in gender-sensitive approaches. It will be important to systematically inform their  
23 patients of the possible occurrence of such emotions as well as the tools and resources  
24 to self-manage as a first step. Considering the impact on morbidity and mortality when  
25 anxiety, depression, or post-traumatic stress are in the diagnostic picture, cardiologists,  
26 cardiac surgeons and family physicians as well as psychologists and other health  
27 professionals involved in cardiac rehabilitation programs must be ready to systematically  
28 inquire and to screen their patients for common mental health conditions. Improved  
29 mental health of these patients will most likely improve their cardiac disease. A larger  
30 study is underway to longitudinally investigate the need for emotional support among  
31 men following a cardiac event as well as exploring acceptability and feasibility of men-  
32 sensitive stepped-care models.  
33  
34  
35  
36

37 **Ethical approval** The study received ethical approval from the research ethics boards  
38 (REB) of the participating study sites: Réseau de santé horizon : 2016-2295; Réseau de  
39 santé Vitalité : 2016-04-13; Université de Moncton : 1516-047; Hôpital Montfort : JJ-04-  
40 11-15; Institut de cardiologie de l'Université d'Ottawa : 2014-1801 (#projet), formulaire  
41 F11-4318; Université de Montréal : MP-33-2016-2006 (# projet), demande # F0-7529; and  
42 Hôpital de Hull : 2016-159 (# projet). All participants signed a confidentiality and consent  
43 form.  
44  
45

46 **Acknowledgements** The authors would like to thank the staff of the participating cardiac  
47 rehabilitation programs for their support with men recruitment, and the research staff  
48 (Arielle Doiron, Lise Gallant, Sarah Nowlan, Vanessa Tassé and Mireille Ntambwe) for their  
49 contribution in the transcription of verbatims, the data organization and the preliminary  
50 coding. The authors would also like to thank the men who have contributed to the focus  
51 groups and semi-structured interviews.  
52  
53  
54  
55  
56  
57  
58  
59  
60

1  
2  
3  
4  
5  
6  
7  
8  
9  
10  
11  
12  
13  
14  
15  
16  
17  
18  
19  
20  
21  
22  
23  
24  
25  
26  
27  
28  
29  
30  
31  
32  
33  
34  
35  
36  
37  
38  
39  
40  
41  
42  
43  
44  
45  
46  
47  
48  
49  
50  
51  
52  
53  
54  
55  
56  
57  
58  
59  
60

**Funding** This paper represents independent research, for which authors received funding from the Movember Foundation-Canada and from the New Brunswick Health Research Foundation. JJ would also like to acknowledge the logistic and financial support provided by the Centre de formation médicale du Nouveau-Brunswick to support this publication.

**Competing interests** None declared.

**Contributorship statement** All authors (Jalila Jbilou, Jean Grenier, Marie-Hélène Chominenne, France Talbot, Heather Tullock, Bianca D'Atono and Paul S. Greenman) have contributed significantly to the design of the project, the planning and the conduct of the data collection, they participated to the team work for the analysis of the data (development of the codebook, training of the research assistants (for first coding and codes' organization), discussions if consensus was not achieved and worked collaboratively on 2<sup>nd</sup> coding and conceptual categorization) and the discussion of the results. Jalila Jbilou and Jean Grenier prepared the first manuscript draft; all authors contributed to, review and approve the final manuscript.

**Data sharing statement** All transcripts have been de-identified following ethical recommendations to protect participants' privacy and confidentiality. Unfortunately, we do not have consent from participants to share the full denominated data publicly. However, Codebooks or sections of the transcripts can be requested by contacting the corresponding author.



## BIBLIOGRAPHY

1. Tully PJ, Cosh SM, Baumeister H. The anxious heart in whose mind? A systematic review and meta-regression of factors associated with anxiety disorder diagnosis, treatment and morbidity risk in coronary heart disease. *Journal of Psychosomatic Research*. 2014.
2. Greenman PS, Viau P, Morin F, Lapointe-Campagna MÈ, Grenier J, Chomienne MH, et al. Of Sound Heart and Mind: A Scoping Review of Risk and Protective Factors for Symptoms of Depression, Anxiety, and Posttraumatic Stress in People with Heart Disease. *J Cardiovasc Nurs*. 2018;33(5):E16–28.
3. Jankowska K, Jacek P, Jankowski K. Psychocardiology - forgotten science in the service of cardiovascular disease prophylaxis Paula Katarzyna Jankowska 1 , Krzysztof Jacek Jankowski 1 , Ewa Rudnicka- Drożak 1 1 Chair and Department of Family Medicine, Medical University of Lublin. 2018;8(5):160–8.
4. Van Straten A, Hill J, Richards DA, Cuijpers P. Stepped care treatment delivery for depression: A systematic review and meta-Analysis. *Psychol Med*. 2015;45(2):231–46.
5. van der Feltz-Cornelis CM, Nuyen J, Stoop C, Chan J, Jacobson AM, Katon W, et al. Effect of interventions for major depressive disorder and significant depressive symptoms in patients with diabetes mellitus: A systematic review and meta-analysis. *Gen Hosp Psychiatry [Internet]*. 2010;32(4):380–95. Available from: <http://dx.doi.org/10.1016/j.genhosppsy.2010.03.011>
6. Davidson KW, Bigger JT, Burg MM, Carney RM, Chaplin WF, Czajkowski S, et al. Centralized, stepped, patient preference-based treatment for patients with post-acute coronary syndrome depression: CODIACS vanguard randomized controlled trial. *JAMA Intern Med*. 2013;173(11):997–1004.
7. Kronish IM, Rieckmann N, Burg MM, Edmondson D, Schwartz JE, Davidson KW. The effect of enhanced depression care on adherence to risk-reducing behaviors after acute coronary syndromes: Findings from the COPES trial. *Am Heart J [Internet]*. 2012;164(4):524–9. Available from: <http://dx.doi.org/10.1016/j.ahj.2012.07.024>
8. Galdas PM, Harrison AS, Doherty P. Gender differences in the factors predicting initial engagement at cardiac rehabilitation. *Open Hear [Internet]*. 2018;5(1):e000764. Available from: <http://openheart.bmj.com/lookup/doi/10.1136/openhrt-2017-000764>
9. Samayoa L, Grace SL, Gravely S, Scott LB, Marzolini S, Colella TJF. Sex differences in cardiac rehabilitation enrollment: A meta-analysis. *Can J Cardiol [Internet]*. 2014;30(7):793–800. Available from: <http://dx.doi.org/10.1016/j.cjca.2013.11.007>

10. Angus JE, King-Shier KM, Spaling MA, Duncan AS, Jaglal SB, Stone JA, et al. A secondary meta-synthesis of qualitative studies of gender and access to cardiac rehabilitation. *J Adv Nurs*. 2015;71(8):1758–73.
11. Yin RK. *Case study research: Design and methods*. Thousand Oaks; CA: Sage Publications; 2013.
12. Smith JA. *Qualitative psychology: A practical guide to research methods*. 3rd ed. Los Angeles: Sage Publications; 2015. 301 p.
13. Tong A, Sainsbury P, Craig J. Consolidated criteria for reporting qualitative research (COREQ): a. *Int J Qual Heal Care* [Internet]. 2007;19(6):349–57. Available from: <http://intqhc.oxfordjournals.org/content/19/6/349.abstract><http://dx.doi.org/10.1093/intqhc/mzm042><https://www.ncbi.nlm.nih.gov/pubmed/17872937> %0AAll Papers/T/Tong et al. 2007 - Consolidated criteria for reporting qualitative research (COREQ) - a 32-i
14. Rodham K, Fox F, Doran N. Exploring analytical trustworthiness and the process of reaching consensus in interpretative phenomenological analysis: lost in transcription. *Int J Soc Res Methodol* [Internet]. 2015;18(1):59–71. Available from: <http://web.a.ebscohost.com.libproxy.boisestate.edu/ehost/pdfviewer/pdfviewer?vid=1&sid=a0afd31c-7f55-4b49-a60d-b7e066912a97%40sessionmgr4010>
15. Eatough V, Smith JA. Interpretative phenomenological analysis. In: *Handbook of Qualitative Research in Psychology*. SAGE Publications Ltd; 2017. p. 193.
16. Miles MB, Huberman AM, Saldana J. *Qualitative Data Analysis: A Methods Sourcebook*. 3rd ed. Arizona State University, USA: Sage Publications Inc.; 2014. 408 p.
17. Gwet KL. *Handbook of inter-rater reliability: The definitive guide to measuring the extent of agreement among raters*. 4th ed. Advanced Analytics; LLC.; 2014.
18. Punjani N, Flannigan R, Oliffe JL, McCreary DR, Black N, Goldenberg SL. Unhealthy Behaviors Among Canadian Men Are Predictors of Comorbidities: Implications for Clinical Practice. *Am J Mens Health*. 2018;12(6):2183–93.
19. Thorne S, Hislop TG, Kim-Sing C, Oglov V, Oliffe JL, Stajduhar KI. Changing communication needs and preferences across the cancer care trajectory: Insights from the patient perspective. *Support Care Cancer*. 2014;22(4):1009–15.
20. Paterson C, Robertson A, Smith A, Nabi G. Identifying the unmet supportive care needs of men living with and beyond prostate cancer: A systematic review. *Eur J Oncol Nurs* [Internet]. 2015;19(4):405–18. Available from: <http://dx.doi.org/10.1016/j.ejon.2014.12.007>

- 1  
2  
3 21. Elliott K. Challenging toxic masculinity in schools and society. *Horiz.*  
4 2018;26(1):17–22.  
5  
6  
7 22. Seidler ZE, Dawes AJ, Rice SM, Oliffe JL, Dhillon HM. The role of masculinity in  
8 men’s help-seeking for depression: A systematic review. *Clin Psychol Rev*  
9 [Internet]. 2016;49:106–18. Available from:  
10 <http://dx.doi.org/10.1016/j.cpr.2016.09.002>  
11  
12 23. Galdas PM, Johnson JL, Percy ME, Ratner PA. Help seeking for cardiac symptoms:  
13 Beyond the masculine-feminine binary. *Soc Sci Med* [Internet]. 2010;71(1):18–24.  
14 Available from: <http://dx.doi.org/10.1016/j.socscimed.2010.03.006>  
15  
16  
17 24. Galdas P, Darwin Z, Kidd L, Blickem C, McPherson K, Hunt K, et al. The accessibility  
18 and acceptability of selfmanagement support interventions for men with long  
19 term conditions: A systematic review and meta-synthesis of qualitative studies.  
20 *BMC Public Health.* 2014;14(1).  
21  
22  
23  
24  
25  
26  
27  
28  
29  
30  
31  
32  
33  
34  
35  
36  
37  
38  
39  
40  
41  
42  
43  
44  
45  
46  
47  
48  
49  
50  
51  
52  
53  
54  
55  
56  
57  
58  
59  
60

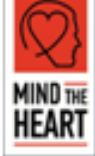

## APPENDIX 1

### « MIND THE HEART » PROJECT

#### FOCUS GROUP DISCUSSION GUIDE

##### ENGLISH VERSION

### INTRODUCTION

Thank you for agreeing to participate in this focus group discussion. This discussion is part of a multi-site participatory action research project, « MindTheHeart », funded by Movember Foundation Canada and the New Brunswick Health Research Foundation that aims at raising awareness for psychologically healthy workplaces for men living with or at risk of HD.

The purpose of this focus group is for the research team to understand the needs, expectations and preferences of men at risk of or living with HD, with regard to interventions such as mental health promotion, mental health prevention, and mental health interventions for MD/AD/TRD. The information gathered will help the research team to design interventions that meet the specific needs of men with HD to prevent or early detect and treat co-occurring mental health issues.

Before we start the discussion, allow us to clarify some points.

1. Could you all kindly verify that you have already signed the consent forms stating your voluntary participation in this focus group?

Yes  No

2. The duration of the focus group discussion will take 90 to 120 minutes in which you have the right to leave the group at any point in time.
3. The whole session will be audio recorded to ensure the accuracy of the information that you provide. However the consent forms that you have signed will ensure that all the information that you share today shall be confidential and anonymous.
4. Please note that each of you confirms that you are aware that anything said during the meeting has to be kept confidential and that you understand that you are not allowed to disclose any information or any names related to this focus group.

Would anyone like to ask any question or has any clarification related to this focus group before we start?

Before we start, could you please take a few minutes to complete this general information sheet? (Give them the information sheet below)

Date: \_\_\_\_\_

**The objective of the following form is to collect general information about you. You can be assured that the information collected will remain confidential and anonymous.**

- 1- Age
- 2- City of residence
- 3- Familial status (tick as apply).
  - Single (never married)
  - Married
  - Common law partner
  - Divorced
  - Widow
  - Other (specify): \_\_\_\_\_.
- 4- Level of education: (tick as apply).
  - Not schooled
  - Primary
  - Secondary
  - College
  - University
  - Other (specify): \_\_\_\_\_.
- 5- Employment status: (tick as apply).
  - Employed
  - Retired
  - Sick leave
- 6- Preferred language for health services (tick all that applies).
  - French
  - English
  - Others (specify): \_\_\_\_\_.
- 7- What is your ethnicity? (tick all that applies).
  - White/Caucasian
  - Black (ex., Haitian, African, Jamaican, Somalia)
  - Latino/Hispanic
  - Asiatic (ex., Chinese, Japanese, Vietnamese)
  - Middle East
  - Native/First Nation/Mixed-Race
  - Pacific Island
  - Other (specify): \_\_\_\_\_.

#### Health status

- 1- Are you suffering from, have you ever suffered from or are you at risk of heart disease?  
(if yes, please specify)
- 2- Are you suffering from a mental health issue?  
(if yes, please specify)

## FOCUS GROUP DISCUSSION GUIDE

### A. Patient Experience

How would you describe your experience with the mental health issues that you have been experiencing following your HD?

- Physical well-being (performing your daily activities, energy levels and physical activity)
- Emotional well-being (interest in sex, experienced feelings, mood and relationships with others)
- Mental health issues (mood and anxiety, ability to make 'good' decisions and be productive)
- Financial situation
- Employment situation (absence from work, productivity, demotions, arguments with colleagues and supervisors, stigma, loss (advantages, respect, confidence...))
- For many men, self-reliance and being competitive are important characteristics. How about you? What are important manly characteristics for you? How might that have changed with HD and mental health issues?
- How do you deal with those changes?

### B. Health Promotion and Prevention Needs

What do you know about the link between HD and mental health issues in men?

- Health literacy/Knowledge/Health education
- What do you wish you had known or done that might have helped you avoid HD and mental health issues?
- For other men experiencing HD and mental health issues, what are the most important pieces of information about the link between HD and mental health issues and how might they be best conveyed?

Regarding risk reduction for HD and mental health issues: What kind of information about mental health and HD do you think will be most useful for you?

- Type of information (statistics, recommendations, health advice, explanations...)
- Communication channels: (read, audio or visual media, seminars, peer education, educational materials, others specify...)
- Location of information delivery (workplace, health care services, community, media)
- Timeliness of information delivery (moment/delay)
- Websites, apps, social media, men testimonies as a source of information, interest and use

### C. Health Services and Clinical Care

What is your experience with the health care that you were provided due to your HD and mental health issues needs in the last five years?

- How connected are you to the health care system and specialist heart and mental health services?
- Relevance of care: Many men tell us they don't want to rely on medications to ensure their mental health or treat specific ailments such as depression? What is your perspective/experience? What is your advice to health care providers about working with male patients who have experienced HD and/or mental health issue?
- Utilization of services: Lots of men are reticent to use professional mental health services – why might that be? What about you, what challenges did you have in seeking heart or mental health care?
- Availability and access to care? (existence of men-sensitive services, factors related to utilization of services: psychologist, insurance coverage, social services...)
- What were some of the areas that you suggest be improved? (your expectations)

Could you please describe your experience with your health care professional (family doctor, cardiologist, nutritionist, kinesiologist, social worker, psychologist, and counselor) regarding information about mental health issues and heart disease?

- Information/Education provided: What type of patient are you? One who likes to be told what to do or would you rather be more involved in the decision making and strategies? Please provide an example of that round your HD and/or mental health issues?
- Perceived expectations and needs
- Patient/Clinicians dynamics (communication, relationship, openness, empathy and shared-decision making)
- Proposed improvements: Can you provide an example of a positive interaction/relationship with a specific health care professional? What are the characteristics of a great health care professional?
- How does the gender of the health care professional influence that relationship?
- Some men like to lead – others like clear instructions. What is your preference and experience of interacting with health care professional?

## Consolidated criteria for reporting qualitative studies (COREQ): 32-item checklist

Developed from:

Tong A, Sainsbury P, Craig J. Consolidated criteria for reporting qualitative research (COREQ): a 32-item checklist for interviews and focus groups. *International Journal for Quality in Health Care*. 2007. Volume 19, Number 6: pp. 349 – 357

**YOU MUST PROVIDE A RESPONSE FOR ALL ITEMS. ENTER N/A IF NOT APPLICABLE**

| No. Item                                       | Guide questions/description                                                                                                                                                                                                                                                                                 | Reported on Page #                                  |
|------------------------------------------------|-------------------------------------------------------------------------------------------------------------------------------------------------------------------------------------------------------------------------------------------------------------------------------------------------------------|-----------------------------------------------------|
| <b>Domain 1: Research team and reflexivity</b> |                                                                                                                                                                                                                                                                                                             |                                                     |
| <i>Personal Characteristics</i>                |                                                                                                                                                                                                                                                                                                             |                                                     |
| 1. Interviewer/facilitator                     | All authors conducted the focus group or the semi-structured interview                                                                                                                                                                                                                                      | Method- Page4                                       |
| 2. Credentials                                 | JJ PhD, MD<br>JG PhD, CPsych<br>MHC MSc, MD<br>FT PhD, LPsych<br>HT CPsych<br>BD'A PhD<br>PSG PhD, CPsych                                                                                                                                                                                                   | Title page-1                                        |
| 3. Occupation                                  | What was their occupation at the time of the study? Researchers, Clinicians or both.                                                                                                                                                                                                                        | -                                                   |
| 4. Gender                                      | Was the researcher male or female? Males (JG, PSG) and Females (JJ, MHC, FT, HT, BD'A)                                                                                                                                                                                                                      | -                                                   |
| 5. Experience and training                     | What experience or training did the researcher have? A MindTheHeart manual for the qualitative study was developed. Training was offered to the researchers and the research staff involved in this study.                                                                                                  | Methods-Page 5                                      |
| <i>Relationship with participants</i>          |                                                                                                                                                                                                                                                                                                             |                                                     |
| 6. Relationship established                    | Was a relationship established prior to study commencement? No                                                                                                                                                                                                                                              | -                                                   |
| 7. Participant knowledge of the interviewer    | What did the participants know about the researcher? Ethical approval had been granted from REB in all participating sites.<br><br>Participants reviewed the project's information sheet and had the opportunity to ask their questions to the interviewers prior to giving their written informed consent. | Ethical approval-<br>Page 15-16<br><br>Method-Page4 |



|                                          |                                                                                                                                                                                                                                                                                                                                                                                                                                                                                  |                |
|------------------------------------------|----------------------------------------------------------------------------------------------------------------------------------------------------------------------------------------------------------------------------------------------------------------------------------------------------------------------------------------------------------------------------------------------------------------------------------------------------------------------------------|----------------|
| 8. Interviewer characteristics           | What characteristics were reported about the inter viewer/facilitator? e.g. Bias, assumptions, reasons and interests in the research topic<br>No interviewer-related bias was identified.                                                                                                                                                                                                                                                                                        | -              |
| <b>Domain 2: study design</b>            |                                                                                                                                                                                                                                                                                                                                                                                                                                                                                  |                |
| <i>Theoretical framework</i>             |                                                                                                                                                                                                                                                                                                                                                                                                                                                                                  |                |
| 9. Methodological orientation and Theory | What methodological orientation was stated to underpin the study? e.g. grounded theory, discourse analysis, ethnography, phenomenology, content analysis<br>Open and axial coding with interpretative phenomenological analysis.                                                                                                                                                                                                                                                 | Methods-Page 5 |
| <i>Participant selection</i>             |                                                                                                                                                                                                                                                                                                                                                                                                                                                                                  |                |
| 10. Sampling                             | How were participants selected? e.g. purposive, convenience, consecutive, snowball<br>Convenience samples<br>The inclusion criteria were: 1) to be 19 and over in New-Brunswick, and 18 and over in Ontario and Quebec; 2) to have had a myocardial infarction, unstable angina, or heart surgery in the last 5 years with or without depression, anxiety or PTSD; 3) to be able to read and speak English or French; and 4) to be willing to participate in a group discussion. | Methods-Page 4 |
| 11. Method of approach                   | How were participants approached? e.g. face-to-face, telephone, mail, email<br>To recruit participants we used a combination of active strategies (patients' solicitation at participating cardiac rehabilitation programs and a snowball technique) and passive strategies (radio broadcasts and local newspapers advertisement).                                                                                                                                               | Methods-Page 4 |
| 12. Sample size                          | How many participants were in the study?<br>93 men                                                                                                                                                                                                                                                                                                                                                                                                                               | Results-Page 5 |
| 13. Non-participation                    | How many people refused to participate or dropped out? Reasons?                                                                                                                                                                                                                                                                                                                                                                                                                  | -              |
| <i>Setting</i>                           |                                                                                                                                                                                                                                                                                                                                                                                                                                                                                  |                |
| 14. Setting of data collection           | Where was the data collected? e.g. home, clinic, workplace<br>At the University or the hospital                                                                                                                                                                                                                                                                                                                                                                                  | Methods-Page 4 |
| 15. Presence of non-participants         | Was anyone else present besides the participants and researchers? No                                                                                                                                                                                                                                                                                                                                                                                                             | -              |
| 16. Description of sample                | What are the important characteristics of the sample? e.g. demographic data, date<br>Data presented in a Table (Table 1)                                                                                                                                                                                                                                                                                                                                                         | Results-Page 6 |

|                                        |                                                                                                                                                                                                                                       |                                      |
|----------------------------------------|---------------------------------------------------------------------------------------------------------------------------------------------------------------------------------------------------------------------------------------|--------------------------------------|
| <i>Data collection</i>                 |                                                                                                                                                                                                                                       |                                      |
| 17. Interview guide                    | Were questions, prompts, guides provided by the authors? Yes<br><br>Was it pilot tested? The guide was reviewed by four patients who did not participate to the study.                                                                | Appendix1 Guide<br><br>Method-Page 4 |
| 18. Repeat interviews                  | Were repeat inter views carried out? If yes, how many? No                                                                                                                                                                             | -                                    |
| 19. Audio/visual recording             | Did the research use audio or visual recording to collect the data? Audio                                                                                                                                                             | Methods-Page 4                       |
| 20. Field notes                        | Were field notes made during and/or after the inter view or focus group? Yes                                                                                                                                                          | Methods-Page 5                       |
| 21. Duration                           | What was the duration of the inter views or focus group? Each focus group consisted of three to six participants and lasted approximately two hours (+/- 35 minutes). The semi-structured interview lasted between 60 and 90 minutes. | Results-Page 5                       |
| 22. Data saturation                    | Was data saturation discussed?                                                                                                                                                                                                        | Methods-Page 4                       |
| 23. Transcripts returned               | Were transcripts returned to participants for comment and/or correction? No                                                                                                                                                           | -                                    |
| <b>Domain 3: analysis and findings</b> |                                                                                                                                                                                                                                       |                                      |
| <i>Data analysis</i>                   |                                                                                                                                                                                                                                       |                                      |
| 24. Number of data coders              | How many data coders coded the data? 12 coders                                                                                                                                                                                        | Methods-Page 5                       |
| 25. Description of the coding tree     | Did authors provide a description of the coding tree? No                                                                                                                                                                              | -                                    |
| 26. Derivation of themes               | Were themes identified in advance or derived from the data? Derived from the data                                                                                                                                                     | Methods-Page 5                       |
| 27. Software                           | What software, if applicable, was used to manage the data?                                                                                                                                                                            | NVivo 11 Pro                         |
| 28. Participant checking               | Did participants provide feedback on the findings? Yes                                                                                                                                                                                | Strengths and limitations            |
| <i>Reporting</i>                       |                                                                                                                                                                                                                                       |                                      |
| 29. Quotations presented               | Were participant quotations presented to illustrate the themes/findings? Was each quotation identified? e.g. participant number Yes                                                                                                   | Results                              |
| 30. Data and findings consistent       | Was there consistency between the data presented and the findings? Yes, mainly                                                                                                                                                        | Discussion                           |
| 31. Clarity of major themes            | Were major themes clearly presented in the findings? Yes                                                                                                                                                                              | Results                              |
| 32. Clarity of minor themes            | Is there a description of diverse cases or discussion of minor themes? Yes                                                                                                                                                            | Discussion                           |
